# Mechanism of Nuclear Movements in a Multinucleated Cell

Romain Gibeaux<sup>1†</sup>, Antonio Z. Politi<sup>1</sup>, Peter Philippsen<sup>2</sup>, François Nédélec<sup>1\*</sup>

<sup>1</sup> Cell Biology and Biophysics Unit, European Molecular Biology Laboratory (EMBL), Meyerhofstrasse 1, 69117 Heidelberg, Germany

<sup>2</sup> Molecular Microbiology, Biozentrum, University of Basel, Klingelbergstrasse 50-70, CH-4056 Basel, Switzerland

\*Corresponding author: [nedelec@embl.de](mailto:nedelec@embl.de)

† Current affiliation: Department of Molecular and Cell Biology, University of California, CA-94720, Berkeley, USA

## RUNNING HEAD

Nuclear movements in *Ashbya gossypii*

## KEYWORDS

Multinucleated cells, Microtubule dynamics, Dynein, Cortical pulling, Computer simulation

## ABSTRACT

Multinucleated cells are important in many organisms but the mechanisms governing the movements of nuclei sharing a common cytoplasm are not understood. In the hyphae of the plant pathogenic fungus *Ashbya gossypii*, nuclei move back and forth, occasionally bypassing each other, and, preventing the formation of nuclear clusters, this is essential for genetic stability. These movements depend on cytoplasmic microtubules emanating from the nuclei, that are pulled by dynein motors anchored at the cortex. Using 3D stochastic simulations with parameters constrained by the literature, we predict the cortical anchors density from the characteristics of nuclear movements. Altogether, the model accounts for the complex nuclear movements seen *in vivo*, using a minimal set of experimentally determined ingredients. Interestingly, these ingredients power the oscillations of the anaphase spindle in budding yeast, but in *A. gossypii* this system is not restricted to a specific nuclear cycle stage, possibly as a result of evolutionary tinkering.

## 39 INTRODUCTION

40

41 Positioning the nucleus and mitotic spindle, appropriately within the cell, is critical in eukaryotes  
42 during many processes, ranging from simple growth to tissue development (Morris, 2002; Dupin and  
43 Etienne-Manneville, 2011; Gundersen and Worman, 2013; Kiyomitsu, 2015). Accordingly, cells have  
44 evolved various strategies to place their nucleus or spindle in the suitable location. In most studied  
45 systems, this process involves dynamic cytoplasmic microtubules (cMTs) and the cMT minus-end  
46 directed motor dynein which can exert cortical pulling of cMT-associated nuclei in two ways. End-on  
47 pulling, when cortex-anchored dynein motors capture growing cMT plus-ends thereby initiating cMT  
48 shrinkage and thus pulling of the cMT, and lateral or side-on pulling without cMT shrinkage, when  
49 cortex-anchored dynein tries to walk on cMTs thereby initiating pulling of the cMT and simultaneously  
50 sliding of the cMT along the cortex (Kotak and Gönczy, 2013; McNally, 2013; Akhmanova and van den  
51 Heuvel, 2016).

52 A detailed mechanistic view for directing nuclei during the cell cycle is known in the budding  
53 yeast *Saccharomyces cerevisiae* as outlined in [Figure 1](#) and references therein. In contrast to most  
54 eukaryotic cells, the site of the cleavage plane in *S. cerevisiae* is selected early in the cell cycle by  
55 generating a ring structure (future bud neck) at the mother cell cortex at which the daughter cell (bud)  
56 will emerge. In addition, in budding yeast the nuclear envelope does not disassemble during mitosis, and  
57 nuclei are always attached to the minus-end of cMTs via spindle pole bodies (SPB) embedded in the  
58 nuclear envelope. The two pathways elucidated in *S. cerevisiae* involve cortical pulling but only the  
59 second pathway relies on dynein. During the Kar9-Bim1-Myo2 pathway, the nucleus is directed towards  
60 the bud neck by transporting cMT plus ends first along bud neck-emerging actin cables followed by  
61 depolymerization of the transported cMT. In metaphase, cMTs are transported along bud neck and bud  
62 tip-emerging actin cables securing positioning of the nucleus close to the bud neck and correct orientation  
63 of the spindle along the mother-bud axis. At pre-anaphase, when the bud has reached its final size, actin  
64 cables no longer emerge from the bud tip and the Dynein-Num1-pathway takes over. At the onset of  
65 anaphase, dynein, transported at the plus-end of cMTs to the bud cortex, starts pulling the spindle through  
66 the bud neck, as soon as dynein is captured by the cortical anchor Num1. An essential step in the cortical  
67 pulling is the switch from inactive dynein at cMT plus ends to active dynein after its association with  
68 Num1. This is regulated to happen first in the bud and later also in the mother cell explaining the observed  
69 back and forth movements of the anaphase spindle during mitosis in *S. cerevisiae*. The pulling of a cMT  
70 by “walking” of cortex-anchored dynein towards the cMT minus end at the SPB does not trigger  
71 depolymerization of this cMT, and the cMT slides head-on with its plus end along the cortex. Also, in  
72 contrast to higher eukaryotes, directing nuclei by dynein-mediated cortical pulling is restricted in *S.*  
73 *cerevisiae* to a small window of the cell cycle regulated by the inhibitor She1 (Woodruff *et al.*, 2009;  
74 Markus *et al.*, 2012).

75 The network of cMTs is also important in multinucleated cells (syncytia), which form at specific  
76 developmental stages in higher eukaryotes like the hundreds of nuclei in mammalian myotubes  
77 (Bruusgaard *et al.*, 2003) or the thousands of nuclei in fertilized eggs of insects (Foe and Alberts, 1983).  
78 During development of myotubes by cell fusions the cMT network is dramatically rearranged (Tassin *et*  
79 *al.*, 1985), the cMT plus end tracking protein EB3 regulates cMT dynamics at the cell cortex (Straube  
80 and Merdes, 2007), and nuclear movements depend on dynein and cMTs (Cadot *et al.*, 2012). Fertilized

81 insect eggs initially develop in the absence of cytokinesis, and at later stages contain thousands of nuclei  
82 that eventually form a very organized layer near the cortex prior to the formation of cells around these  
83 nuclei. Recent progress in manipulating this system (Telley *et al.*, 2012) revealed that the spreading of  
84 nuclei depends on MT asters, F-actin and the elongating anaphase spindle. However, it is not exactly  
85 known how nuclei move apart and which cortical forces dictate their dispersion and final positioning at  
86 the cortex. An essential role of dynein and cMTs in controlling movements and distribution of multiple  
87 nuclei in a common cytoplasm has also been documented for several filamentous fungi (Morris, 2002;  
88 Xiang and Fischer, 2004; Fink *et al.*, 2006; Mouriño-Pérez *et al.*, 2006). Attempts to analyze molecular  
89 mechanisms for controlling movements of multiple nuclei in these fungi were hampered by the fact that  
90 dynein and cMTs are also involved in essential transports of organelles. A notable exception is the plant-  
91 pathogenic fungus *Ashbya gossypii*, which evolved from a budding yeast precursor based on its genome  
92 (Dietrich *et al.*, 2004, 2013) and which, like *S. cerevisiae*, exploits dynein and cMTs exclusively for  
93 nuclear movements in its multinucleated and constantly elongating cells, called hyphae (Figure 2A). Not  
94 only the genes but also cellular networks are highly conserved compared with *S. cerevisiae*. Thus, the  
95 different cellular life style of *A. gossypii* is driven by homologs of well-studied *S. cerevisiae* genes, in  
96 particular those implicated in the cell cycle, polar growth and cytoskeleton. With respect to *A. gossypii*  
97 nuclear biology, we begin to fully understand asynchronous mitoses of multiple nuclei in a common  
98 cytoplasm (Gladfelter *et al.*, 2006; Lee *et al.*, 2013), but we are still missing a comprehensive mechanism  
99 for the complex nuclear motility during hyphal growth.

100 Within the hyphae of *A. gossypii*, nuclei permanently perform short-range back and forth  
101 excursions, which presumably help avoiding formation of nuclear aggregates, as well as longer-range  
102 movements, frequently leading to nuclear bypassing events that continuously permute nuclei (Alberti-  
103 Segui *et al.*, 2001; Gladfelter *et al.*, 2006; Grava *et al.*, 2011). This reordering prevents that a detrimental  
104 mutation acquired in the haploid genome of one nucleus would remain concentrated in a hyphal segment,  
105 and dominate its genetic landscape. Nuclear movements require cMTs and functional SPBs permanently  
106 embedded, like in *S. cerevisiae*, in the nuclear envelope. In the absence of cMTs or functional SPBs,  
107 oscillatory and bypassing movements do not occur and nuclei are passively transported with the  
108 cytoplasmic stream in the direction of hyphal tip growth (Alberti-Segui *et al.*, 2001; Gladfelter *et al.*,  
109 2006; Lang *et al.*, 2010a, 2010b). *A. gossypii* cMTs grow with 6  $\mu\text{m}/\text{min}$ , three times faster than *S.*  
110 *cerevisiae* cMTs, and thus can always reach hyphal tips the maximal speed of which is 3.3  $\mu\text{m}/\text{min}$  (Grava  
111 and Philippsen, 2010).

112 Interestingly, a single type of minus-end directed MT motor – dynein – is responsible for all active  
113 nuclear movements during hyphal growth. Indeed, reducing the expression level of the dynein heavy  
114 chain by truncating the AgDYN1 promoter led to the decrease of oscillatory and bypassing movement  
115 frequencies (Grava *et al.*, 2011). Dynein is localized at different cMT positions: At cMT minus ends  
116 (SPBs), along cMTs and at cMT plus ends, especially of long cMTs. It has been suggested that, once  
117 anchored to the hyphal cortex, dynein could exert pulling forces that would move the nuclei (Grava and  
118 Philippsen, 2010), essentially as proposed for the anaphase spindle pulling in *S. cerevisiae* (Lee *et al.*,  
119 2003; Sheeman *et al.*, 2003). This is supported by the phenotype of hyphae lacking functional AgNum1  
120 (Grava *et al.*, 2011). In the same study, it was shown that AgKar9 or AgBim1 are not important for  
121 bidirectional movements and bypassing of nuclei, which is not surprising because nuclear positioning is  
122 not an issue in growing *A. gossypii* hyphae. Electron tomography revealed that each SPB nucleates on

123 average 3 cMTs and that SPBs are frequently found as duplicated side-by-side entities (G2 phase of the  
124 nuclear cycle) (Gibeaux *et al.*, 2012). This is in line with the *in vivo* observation that up to 6 cMTs  
125 emanate from one nucleus (Lang *et al.*, 2010b).

126 Altogether, these observations suggest a mechanistic hypothesis for nuclear motility in *A. gossypii*  
127 hyphae: Highly dynamic cMTs emanating in different directions from the nuclear envelope-embedded  
128 SPB would reach the cortex, and be pulled by dynein anchored to it (Figure 2B). This model is appealing  
129 because it involves only one motor and seems qualitatively complete. Yet, it is not clear if a single mode  
130 of action could explain the complexity of the observed movements. To this end, we implemented this  
131 model with *Cytosim* ([www.cytosim.org](http://www.cytosim.org)), to simulate the motion of multiple nuclei in a 3D geometry,  
132 using flexible and dynamic cMTs. Using physically realistic equations of motion, the simulation  
133 computes the nuclei movements that can be directly compared to the movements observed in live-  
134 imaging experiments. With parameter values obtained from published experimental measurements, our  
135 simulation was able to match the measured motion of nuclei, and we could thus test different  
136 experimental settings relating to how cMT dynamics, cMT number per nucleus, cortical Num1 density,  
137 cytoplasmic streaming or organelle crowding impact on nuclear movements in multinucleated hyphae.

138

## 139 RESULTS

140

### 141 A computational method for validation of natural and simulated nuclear movements

142 The nuclei in live *A. gossypii* hyphae can easily be observed with fluorescence microscopy  
143 (Figure 2A; Video 1), and their bidirectional movements including bypassing have already been  
144 characterized (Alberti-Segui *et al.*, 2001; Gladfelter *et al.*, 2006; Grava and Philippsen, 2010; Lang *et*  
145 *al.*, 2010b; Grava *et al.*, 2011; Anderson *et al.*, 2013). In these publications, different methods were  
146 employed to measure nuclear movements, most not applicable for our computational simulation.  
147 Therefore, we established an automatic method to measure nuclear motility parameters which we first  
148 applied to re-analyze *in vivo* nuclear movements. Spatial and temporal information was extracted from  
149 videos of 12 hyphae expressing GFP-tagged histone H4 recorded over 25-30 min (see example in Figure  
150 2B and Video 1). In each hypha, we tracked the 2D positions of the first 5 nuclei (and in few cases their  
151 progeny) to accurately follow their movements. The dataset was rotated to calculate the position of the  
152 nuclei along the hypha main axis. A global analysis, first, showed that nuclei are moving in the direction  
153 in which the hyphae grows (Supplemental Figure S1A), at a speed that matches the growing speed for  
154 nuclei located near the tip of the hyphae. We thus used the measured growth speed of the hyphal tip to  
155 set the flow in the simulation. On top of this streaming motion, the analysis showed that cMT-dependent  
156 nuclear motility is diffusive at long time scales, with an effective diffusion coefficient of  $\sim 0.0113 \mu\text{m}^2/\text{s}$   
157 (Supplemental Figure S1B). By comparison, the Brownian motion of the nuclei leads to a diffusion  
158 coefficient of  $\sim 0.0003 \mu\text{m}^2/\text{s}$ , using Stokes' law with our estimate of cytoplasmic viscosity. Hence,  
159 although cMT-driven motions of nuclei appear non-directed, they increase the diffusion speed  
160 dramatically. We also expect that Brownian forces alone would not be sufficient to permute nuclei such  
161 that nuclear bypassing is a hallmark of cMTs dependent movements.

162 We then performed a more detailed analysis, as illustrated in the first three panels of Figure 3 for  
163 one representative hypha. We first generated a standard representation of patterns of nuclear movement  
164 to allow visual comparisons to previously published analyses (Figure 3A) and then produced  
165 standardized schemes to document the frequent changes in the direction and speed of individual nuclei  
166 (Figure 3B and C, respectively). Using the cytoplasmic flow speed  $v_h$  as a threshold, we classified the  
167 movements in three categories: forward ( $v_h < v$ ), backward ( $v < 0$ ) and tumbling ( $0 < v < v_h$ ). From this,  
168 we computed frequencies, durations and average speed (i.e. average of the instantaneous velocities) for  
169 each class. The result of the analysis of the 12 hyphae (70 nuclei) is reported in Supplemental Table S1,  
170 and the average of each motility parameter in Table 1. As can be seen in the top row of this table, on  
171 average nuclei performed  $0.279 (\pm 0.033 \text{ SD})$  forward movements per minute and  $0.208 (\pm 0.065 \text{ SD})$   
172 backward movements per minute with an average speed of  $0.864 (\pm 0.209 \text{ SD}) \mu\text{m}/\text{min}$ . The average  
173 ratio of forward to backward frequencies (here  $1.628 \pm 1.190 \text{ SD}$ ) will be used later extensively for  
174 comparing simulation conditions, because it is a simple yet sensitive readout of the movements. We also  
175 automatically detected nuclei reordering events – when one nucleus bypasses another one. These events  
176 occur at a frequency of  $0.026 (\pm 0.023 \text{ SD})$  per minute which means that about 10% of the forward or  
177 8% of backward movements lead to nuclear bypassing.

178

### 179 Implementation of a simulation system for nuclear movements in *A. gossypii*

180 Accumulated evidence summarized in the introduction and the legend of Figure 2B supports a



181 qualitative model for nuclear movements in *A. gossypii*: Cortex-anchored dynein exert pulling forces on  
182 dynamic cMTs, nucleated from SPBs, and thus drive the movements of nuclei at all cell cycle stages  
183 (Figure 2B). To test whether this model is physically plausible and sufficient to explain the observed  
184 complex nuclear motility, we generated a computer simulation of the process within hypha-like 3D  
185 geometry using the *Cytosim* platform (Nedelec and Foethke, 2007). For cell biological parameters of the  
186 simulation, we considered numerous life cell imaging data mentioned above. We also considered high-  
187 resolution EM studies including the EM tomography-based 3D model of an *A.gossypii* hypha (Lang *et al.*,  
188 2010b; Gibeaux *et al.*, 2012, 2013). For example, nuclei with one SPB emanate 3 cMTs but a high  
189 percentage of nuclei carry two side-by side SPBs emanating 6 cMTs (Figure 3D, top image). We therefore  
190 implemented simulations with 3 cMTs and simulations with 6 cMTs per nucleus for each tested condition.  
191 To account for the organelle-crowded cytoplasm, we simulated mitochondria and vacuoles (Figure 3D,  
192 bottom image, orange and blue organelles, respectively) as spheres the number and volume of which  
193 matched the measurements as discussed in more detail below Figure 7). In all simulation images, these  
194 spheres are present but not displayed for clarity.

195 We knew that 30 min monitoring of 5 nuclei in a 30  $\mu\text{m}$  long hyphal segment, corresponding to  
196 the average *in vivo* spacing of nuclei (Lang *et al.*, 2010a), is sufficient to document nuclear motility  
197 parameters, and we therefore simulated a hyphal segment of this size as a cylindrical volume with  
198 periodic boundaries. In the graphical representations of simulated hyphae shown in Figure 3E, a nucleus  
199 or a cMT may thus leave the cylinder at the right side and reappears at the left side, or *vice versa*. There  
200 is, however, no edge in the simulated space. The two simulation images of Figure 3E display the elements  
201 that were implemented to test whether a nuclear motility pattern similar to wild type hypha can be  
202 reproduced. All cMTs (thin white rods) emanate from one site (SPB or duplicated SPB) of a nucleus,  
203 they remain attached to this site while they are elongating, they can undergo very fast shortening until  
204 they disappear inducing at this SPB a new cMT to form immediately. Cytoplasmic MTs exclude each  
205 other and cannot penetrate nuclei and other simulated organelles, they can elongate in all directions and,  
206 upon contact of a tip (+end) with the cylinder boundary (cortex), continue to elongate while sliding along  
207 the cylinder boundary. They are programmed to engage in pulling forces (thereby moving the attached  
208 nucleus) when they hit one or more of the randomly distributed immobile white dots at the simulated  
209 cortex (patches of the dynein-activating anchor Num1) highlighted by increased dot intensity, and they  
210 are programmed to terminate pulling according to a detachment rate and in response to counteracting  
211 forces. All quantitative parameters used for implementing the simulation of nuclear movements, such as  
212 the viscosity of the cytoplasm, were obtained from the literature and are reported in Table 2, with the  
213 exception of the fitted cortical density of Num1 (see Figure 5).

214 We also created a flow component to model the effect of the cytoplasmic streaming present in  
215 growing hyphae. Unlike in fungal colonies such as the ones made by *N. crassa* (Ramos-García *et al.*,  
216 2009; Roper *et al.*, 2013), the hyphae of *A. gossypii* do not fuse with each other, and the flow does not  
217 change directions. The flow is thus characterized by a speed  $v_{flow}$  (Figure 3E), and for simplicity, we  
218 neglected the detailed micro flows that could arise around nuclei, and their hydrodynamic interactions,  
219 and only adjusted the viscous drag force in the equation of motion to:  $-\xi(v - v_{flow})$ , where  $\xi$  is the  
220 viscous drag coefficient. The flow affects all objects in the simulation, such that any object moves at the  
221 speed of the flow, unless it is subjected to other forces than the drag. The average cytoplasmic streaming  
222 in our *in vivo* dataset was 0.009  $\mu\text{m}/\text{s}$  (Table 1), and we used this value for the parameter  $v_{flow}$  in most

223 simulations. The effects of much lower or faster cytoplasmic flow speeds on nuclear movements are  
224 discussed below (see [Figure 6](#)).

#### 225 226 ***A. gossypii* nuclear movement patterns can be reproduced *in silico*.**

227 We computed 200 simulations (1000 nuclei) with 3 cMTs nucleated per nucleus ([Video 2](#)), and  
228 another set with 6 cMTs per nucleus ([Video 3](#)). To provide a visual readout and for comparison purpose,  
229 we plotted the patterns of nuclear movement for one simulation with 6 cMTs per nucleus ([Figure 3F to](#)  
230 [H](#)). The short-range oscillations and long-range movements as well as the patterns of direction changes  
231 and the speed of movements were very similar as the *in vivo* measurements (compare to [Figure 3A to C](#)).  
232 This similarity also holds when the averages of all simulations are compared with the *in vivo* measured  
233 values ([Table 1](#)). With 3 cMTs per nucleus, the frequencies of movements were: forward  $0.336 (\pm 0.031$   
234  $\text{SD}) \text{ min}^{-1}$ , backward  $0.147 (\pm 0.026 \text{ SD}) \text{ min}^{-1}$ , giving a ratio of  $2.370 (\pm 0.512 \text{ SD})$  ([Table 1](#)). With 6  
235 cMTs per nucleus, backward movements were more pronounced: forward =  $0.290 (\pm 0.031 \text{ SD}) \text{ min}^{-1}$ ,  
236 backward =  $0.189 (\pm 0.03 \text{ SD}) \text{ min}^{-1}$ , with a ratio of  $1.576 (\pm 0.331 \text{ SD})$  ([Table 1](#)). Interestingly, the  
237 simulations with 6 cMTs per nucleus matched the values extracted from experimental data better, which  
238 is consistent with the previous observation that *A. gossypii* hyphae contain more nuclei with duplicated  
239 side-by-side SPBs than with a single SPB (Gibeaux *et al.*, 2012). Surprisingly, the change in cMT number  
240 does not seem to influence the frequency of bypassing events, although it affects the balance between  
241 forward and backward movements ([Table 1](#)).

242 Finally, it was previously observed that the SPB is leading the nuclear mass during a pulling  
243 event. If the direction of pulling changes, the SPB relocates within a minute to the opposite side of the  
244 nucleus, which becomes the new leading front (Lang *et al.*, 2010a). These detailed SPB movements were  
245 actually well captured in the simulation (see [Video 4](#)).

#### 246 247 **Phenotypes of mutations affecting microtubule dynamics are verified by simulations**

248 Nuclei in hyphae lacking Bik1, the cMT +end stabilizing homolog of CLIP170, generate shorter  
249 cMTs compared to wild type, and show decreased frequencies of bidirectional movements and no  
250 bypassing. The growth of this deletion mutant is not affected because nuclei migrate with the  
251 cytoplasmic stream. In contrast, nuclei in hyphae lacking Kip3, the cMT destabilizing homolog of  
252 kinesin-8, generate longer cMTs and display increased frequencies of bidirectional movements and  
253 bypassing compared to wild type (Grava and Philippsen, 2010). We wanted to know to which degree  
254 simulations with altered cMT dynamic are able to reproduce known changes in nuclear mobility patterns  
255 caused by mutations affecting cMT dynamics. We thus decided to implement, in a new set of simulations,  
256 parameters representing the changed cMT dynamics in the *bik1* and *kip3* mutant. In addition, we  
257 implemented in a third set of simulations the dynamic instability parameters of *S. cerevisiae* cMTs.

258 Graphical images representing the cMT length differences in simulations with altered cMT  
259 dynamic are shown in [Figure 4A](#). The parameters for dynamic instability of cMTs in hyphae lacking  
260 Bik1 or Kip3 were modeled using the “classical” two-states model ([Figure 4B](#)). For this modeling,  
261 growth and shrinkage speeds are constant, and catastrophes occur stochastically as first-order events.  
262 Rescues are not considered, because rescues have not been observed in *A. gossypii*, but new cMTs are  
263 nucleated by the SPB at each unoccupied site. We used the cMT polymerization rates  $v_g$  measured in  
264 each mutant (Grava and Philippsen, 2010) and estimated the catastrophe rate from the lengths of cMTs

265 that had been determined by light microscopy of fixed and immuno-labeled mutant hyphae. Specifically,  
266 we estimated the average length  $L$  by fitting an exponential on the truncated length distributions, between  
267 1 and 20  $\mu\text{m}$  (Figure 4B and Materials and Methods). Unlike the average of all values, this procedure  
268 (Fraile and García-Ortega, 2005) avoided the bias in the data due to the fact that shorter cMTs would be  
269 missed in light microscopy. The longest cMT in the WT dataset was 26.6  $\mu\text{m}$ . and 20  $\mu\text{m}$  was chosen as  
270 an upper limit to include most of the data in all conditions. The catastrophe rate was then calculated as  
271  $v_g / L$  which, compared to wild type, increased about four-fold in the *bik1* mutant and decreased about  
272 two-fold in the *kip3* mutant (Figure 4B). The catastrophe rate for *S. cerevisiae* and *A. gossypii* cMTs are  
273 similar but the growth and shrinkage speeds are three-fold slower in *S. cerevisiae* (Figure 4B) according  
274 to averaged published data (Tirnauer *et al.*, 1999; Adames and Cooper, 2000; Kosco *et al.*, 2001; Huang  
275 and Huffaker, 2006; Wolyniak *et al.*, 2006; Caudron *et al.*, 2008).

276 Simulations with 3 cMTs and 6 cMTs were computed, and videos with 3 cMTs are documented  
277 for *bik1* $\Delta$  (Video 5), *kip3* $\Delta$  (Video 6) and *S. cerevisiae* cMT dynamic (Video 7, discussed below).  
278 Already, the visual representation of one simulation each (Figure 4C) reveals the successful verification  
279 of the nuclear mobility in hyphae lacking Bik1 (mainly migration with the simulated flow) or Kip3  
280 (extensive bidirectional movements and bypassing). For quantitative comparisons, number averages for  
281 all nuclear movement parameters are compiled in Supplemental Table S2. Box-plot diagrams (Figure  
282 4D) representing 200 simulations each for the mutants and for wild type confirm in a quantitative manner  
283 the decrease in active nuclear movements in the absence of Bik1 (shorter cMTs) and the increase in active  
284 nuclear movements in the absence of Kip3 (longer cMTs). Similar box-plot diagrams for simulations  
285 with 6 cMTs, shown in Supplemental Figure S2A, confirm these conclusions. Interestingly, nuclear  
286 movements increased monotonously as a function of the average cMT length (*bik1* $\Delta$  < “wild-type” <  
287 *kip3* $\Delta$ ). Between the two extremes (rare contact of nuclear cMTs with cortical Num1 in the *bik1* mutant  
288 and more contact than wild type in the *kip3* mutant), the average duration of forward and backward  
289 movements increased roughly 1.5 and 3.5-fold, respectively (Figure 4D). The frequency of bypassing  
290 events also increased (6.4 fold with 3 cMTs and 8.7-fold with 6 cMTs) and the frequency of tumbling  
291 events dropped about 2-fold (Figure 4D; Supplemental Figure S2A). The flow speed of 0.009  $\mu\text{m}/\text{s}$  used  
292 in the wild type simulations (Figure 3) was also applied in these mutant simulations. As the average  
293 cytoplasmic flow speed of the *in vivo* experiments was 0.013  $\mu\text{m}/\text{s}$  (Grava and Philippsen, 2010), we  
294 repeated all simulations implementing this flow speed. The results were similar except for an even higher  
295 reduction in backward movements in the simulated *bik1* mutant, most likely due to the increased flow  
296 speed (see Supplemental Table S2). Altogether, these calculations demonstrate that the sole modification  
297 of cMT dynamics is sufficient to explain the phenotypes observed in *bik1* $\Delta$  and *kip3* $\Delta$  mutants,  
298 illustrating that cMT dynamics is a key parameter governing nuclear motions in hyphae.

299 The visualization of the simulated nuclear movements controlled by *S. cerevisiae* cMT dynamic  
300 (Figure 4C, right panel) shows a rather passive moving pattern of the five nuclei which seem to mainly  
301 migrate with the applied flow speed. We computed 200 simulations (1000 nuclei) with 3 cMTs nucleated  
302 per nucleus (Video 7), as well as another set with 6 cMTs per nucleus, and quantified the movements  
303 (see summary in Supplemental Table S2). Nuclei dynamic parameters are very similar to those observed  
304 in the simulated *bik1* $\Delta$  mutant, in which cMTs are also short and rarely reach a cortical activator to induce  
305 active movements. However, the *S. cerevisiae* simulation reveals longer lasting backward movements  
306 and a still low but higher frequency of bypassing events compared to the *bik1* mutant. We had performed



307 this experiment knowing that *A. gossypii* evolved from a *S. cerevisiae*-like ancestor, and we thus had  
308 wondered to which extent the adaptation of cMT dynamics has been important in switching from a  
309 budding mechanism to filamentous growth. The simulation indicates that an increase of the cMT growth  
310 rate, possibly through the adjusted influence of MT-associated proteins, without changing the catastrophe  
311 rate could have been sufficient to induce movements of nuclei against the cytoplasmic stream and also  
312 nuclear bypassing. This scenario, however, would only have worked with a simultaneous ten-fold density  
313 increase of cortical Num1 patches as demonstrated in the next chapter.

### 314 315 **Nuclear movements require an adapted density of cortical anchors**

316 The minus-end directed MT motor dynein is responsible for all active nuclear movements in *A.*  
317 *gossypii*. It localizes to –ends and +ends of cMTs and also along cMTs. Hypha with inactivated dynactin  
318 or Num1 show severely reduced active nuclear movements concomitant with enrichment of dynein at  
319 cMT +ends (Grava *et al.*, 2011). These phenotypes and the observed onset of pulling, when a cMT slides  
320 along the hyphal cortex, described by the same authors, support a mechanism for cortical pulling known  
321 from studies in *S. cerevisiae*. The dynein/dynactin complex is thought to be inactive while transported  
322 either by the kinesin Kip2 towards the cMT +ends or directly recruited to +ends from the cytoplasm  
323 (Markus *et al.*, Current Biology 2009; Markus and Lee, 2011; Roberts *et al.*, 2014). When the cMT +end  
324 associates with a cortical Num1 patch during sliding at the plasma membrane, the dynein/dynactin  
325 complex would be off-loaded, anchored with the amino terminal tail of Dyn1, the dynein heavy chain,  
326 to the amino terminal binding domain of Num1, and the dynein motor activated to eventually pull on the  
327 cMT on which it was previously hitchhiking (Lee *et al.*, 2003; Moore *et al.*, 2009; Markus and Lee,  
328 2011). Recently, it was demonstrated that dynein is directly switched on by the cortical anchor Num1  
329 (Lammers and Markus, 2015).

330 The dynein-binding domain and the lipid-binding domain of ScNum1 are conserved in AgNum1,  
331 and recently patches of an AgNum1-GFP fusion were observed at the *A. gossypii* cortex (Doris  
332 Landmann, unpublished). Knowing the close evolutionary relation between *S. cerevisiae* and *A. gossypii*,  
333 we assumed a similar role of Num1 in anchoring and activating dynein in both organisms. As the cortical  
334 density of Num1 patches is presently unknown, we ran simulations with different numbers of randomly  
335 distributed cortical anchors. As already described above, we envisage that these anchors will engage  
336 cMTs that are within their reach, and immediately recruit dynein. The duration of a pulling event is then  
337 determined by the off-rate of the motor domain to the cMT (see [Materials and Methods](#)). In terms of  
338 nuclear movements, this simplified model is sufficient because forces are only created when dynein is  
339 anchored at the cortex and engaged with a cMT. With this model, the density of anchors on the cortex  
340 ( $\sim 0.7$  anchors per  $\mu\text{m}^2$  in all simulations discussed so far) is the key parameter controlling the efficacy  
341 of dynein-mediated cortical pulling. Hence varying the absolute number of anchors in the simulation can  
342 be qualitatively compared to the phenotypes of changing the overall dynein expression level in live cells.

343 Experimentally reducing the expression level of the dynein heavy chain by truncating the  
344 *AgDYN1* promoter decreases oscillatory and bypassing movement frequencies (Grava *et al.*, 2011). In  
345 simulations, reducing the amounts of anchors 2-fold ([Video 8](#)) or 10-fold ([Video 9](#)) clearly reduced active  
346 nuclear movements (see also [Figure 5A](#) and [Supplemental Table S3](#)). The reduction in density also  
347 increases the movement frequency ratio ([Figure 5B](#), top; by favoring forward movements induced by the  
348 cytoplasmic flow), decreases the frequency of bypassing events ([Figure 5B](#), middle) and increases the

349 frequency of tumbling events (Figure 5B, bottom), as previously described *in vivo* for the prom180-  
350 DYN1 and prom130-DYN1 strains, in which the *DYN1* promoter was shortened to 180 or 130-bp of the  
351 original sequence upstream of the start codon thereby reducing gene expression (Grava *et al.*, 2011). We  
352 then continuously varied the anchor density from 0 to 1000 molecules per 30  $\mu\text{m}$  of hypha (0 to 3.5  
353 anchors per  $\mu\text{m}^2$ ). Above a certain threshold of anchor density, the pattern of nuclear movements is  
354 constant, and determined purely by cMT encounters with cortex-bound Num1 patches. The value of the  
355 threshold is lower with 6 cMTs per nucleus (Figure 5C, bottom) than with 3 cMTs per nucleus (Figure  
356 5C, top), indicating that increasing the density of anchors can compensate for a reduced count of cMTs.  
357 This can be understood since dynein pulling on a single cMT is sufficient to move a nucleus. In the  
358 saturated regime where anchors are in excess, the frequency ratio is close to 1 (Figure 5D, left). However,  
359 the value measured experimentally is  $\sim 1.6$ , suggesting that active force generation is indeed limiting *in*  
360 *vivo*. In other words, not every cMT contacting the cortex *in vivo* is pulled by dynein. The same  
361 conclusion can be derived from the frequencies of bypassing events: the measured *in vivo* value of  $\sim 0.026$   
362 /min is only half of the predicted plateau value of 0.05 /min (Figure 5D, right). Altogether, these results  
363 show that, despite necessary simplifications, our model has captured how nuclear movements depend on  
364 dynein, as measured *in vivo*.

365 Interestingly, an amount of 20 anchors per hypha segment, which corresponds to 0.07 anchors  
366 per  $\mu\text{m}^2$ , also matches the observed density of Num1 patches in *S. cerevisiae* ( $\sim 8$  patches per cell). The  
367 fact that at this density only very few movements are produced in our simulation (Figure 5A-B)  
368 demonstrates that *A. gossypii* had to adjust the density of Num1 patches to be compatible with hyphal  
369 growth. Specifically, our simulations suggest that a 10-fold increase in anchor density would allow  
370 enough cMT capture to promote sufficient nuclear movements.

371

### 372 **The impact of cytoplasmic streaming on nuclear movements depends on cMT number**

373 To further explore the role of cMT number on the balance between forward and backward  
374 movements, we searched for its importance in the context of varying flow speeds. Indeed, hypha growth  
375 speed – and the resulting cytoplasmic flow – was previously shown to impact the balance between  
376 forward and backward movements (Lang *et al.*, 2010b). However, the role of cMT number in this balance  
377 has not been investigated yet. We therefore ran simulations with flow speeds randomly varying between  
378 0 and 0.02  $\mu\text{m}/\text{s}$ , corresponding to the range of hypha growth speeds for which *in vivo* data were  
379 previously collected (Lang *et al.*, 2010b). The cMT length was controlled as in wild type. For either  
380 condition, with 3 or 6 cMTs per nucleus, we generated 200 random values for the flow speed and ran 3  
381 simulations for each of them. For both conditions, the frequency of forward movements was roughly  
382 independent of flow speed (frequencies being lower with 6 cMTs, on average) (Figure 6A) whereas  
383 backward movements decreased with an increasing flow speed, and this decrease was more pronounced  
384 if the nuclei nucleated 3 cMTs (Figure 6B). The movement frequencies ratio thus remains quite stable  
385 for nuclei nucleating 6 cMTs but gets higher and highly biased towards forward movements with  
386 increasing flow speed for nuclei nucleating 3 cMTs (Figure 6C). Noticeably, the values of frequencies  
387 and ratio observed in our simulations are in agreement with the values measured experimentally, once  
388 these are plotted according to the naturally occurring variable hypha growth rates (Figure 6A-C, blue  
389 dots). Visualizations of nuclear movement patterns for both conditions at a flow speed of 0 and 0.02  $\mu\text{m}/\text{s}$   
390 are presented in Figure 6D and 6E, respectively. These patterns show that at a flow speed of 0  $\mu\text{m}/\text{s}$  there

391 is no bias for any direction of movement (Figure 6D; 3 cMTs: Video 10; 6 cMTs: Video 11). However,  
392 at a flow speed of 0.02  $\mu\text{m/s}$ , a clear bias for forward movements is visible, more importantly for nuclei  
393 nucleating 3 cMTs (Figure 6E; 3 cMTs: Video 12; 6 cMTs: Video 13). Is this clear difference between 3  
394 and 6 cMTs per nucleus also seen when flow speeds are tested in hyphae with altered average cMT  
395 lengths, like in the *bik1* or *kip3* mutants? The answer is yes, when cMTs are slightly longer as in the *kip3*  
396 mutant, and no, when the cMTs are too short in the *bik1* mutant, either with 3 cMTs (Supplemental Figure  
397 S2B) or 6 cMTs (Supplemental Figure S2C).

398 Finally, because hyphal growth can reach speeds as high as 0.05  $\mu\text{m/s}$ , we wondered if the  
399 reduced bias for increased cMT number would still be true in such extreme cases. We thus ran additional  
400 simulations with flow speeds now randomly varying between 0 and 0.05  $\mu\text{m/s}$ . For either condition, with  
401 3 or 6 cMTs per nucleus, we generated 500 random values for the flow speed and ran 3 simulations for  
402 each of them. Interestingly, the movement frequencies ratios still remained much lower for nuclei  
403 nucleating 6 cMTs than for nuclei nucleating 3 cMTs even at very high flow speeds (Figure 6F).  
404 Altogether, these results suggest that having additional cMTs may reduce the bias for forward movements  
405 that occurs at rapid hyphal growth, i.e. large flow speeds. This also argues for an evolutionary advantage  
406 of spending more time in the G2 phase of the nuclear cycle, as compared to a *S. cerevisiae*-like ancestor,  
407 allowing the nuclei to carry duplicated side-by-side SPBs for a longer time than in *S. cerevisiae*  
408 (Jaspersen and Winey, 2004).

#### 409 410 **Organelle crowding interferes only marginally with nuclear movements**

411 The cytoplasm is a crowded environment (Figure 3D), and in particular larger organelles may  
412 hinder the movements of the nuclei. Since electron tomography revealed the size and density of large  
413 organelles within hyphae of *A. gossypii* (Gibeaux *et al.*, 2013), we can use this information to estimate  
414 in the model the extent to which the resulting crowding affects nuclear dynamics. In the simulation, we  
415 represented mitochondria – that frequently undergo fission and fusion events *in vivo* – as spheres of 0.4  
416  $\mu\text{m}$  in diameter occupying 8.8% of the cytoplasm (Figure 7A, orange) and other large spherical organelles  
417 such as vacuoles as spheres of 0.6  $\mu\text{m}$  in diameter occupying 2.5% of the cytoplasm (Figure 7A, blue).  
418 Also, a soft excluded volume interaction is present between all objects (see Materials and Methods). The  
419 standard “wild-type” model already contains organelles according to their measured characteristics. We  
420 ran two additional sets of simulations: one with no organelles (Figure 7A, top; Video 14) and a second  
421 one where the vacuole-like organelles were inflated to 1.4  $\mu\text{m}$  in diameter (Figure 7A, bottom; Video  
422 15), as has been observed for vacuoles in old hyphae (Walther and Wendland, 2004). Similar results were  
423 obtained for simulations with either 3 cMTs (Figure 7B-C; Video 14-15) or 6 cMTs (Supplemental Figure  
424 S3A-B) per nucleus. The averages for nuclear parameters determined from these simulations are  
425 summarized in Supplemental Table S4. Between the “empty” and the “highly crowded” simulations, the  
426 average duration of forward movements was reduced by ~10% (the ratios were 1.16 with 3 cMTs and  
427 1.10 with 6 cMTs). Crowding also reduced the average duration of backward movements by ~5% (ratios  
428 were 1.05 and 1.04), reduced the frequency of bypassing events (ratios 1.05 and 1.30) and increased the  
429 frequency of tumbling events by ~20% (ratios 1.18 and 1.17). All these differences are small, and in  
430 particular the results for the “wild-type” case with realistic crowding parameters are very close to the  
431 “empty” simulation without organelles (Figure 7B; Supplemental Figure S3A). This indicates that the  
432 load on dynein motors is only a small fraction of their stall force, because the viscous drag on the nucleus

433 and impeding surrounding objects do not provide much resistance. We next asked if, as for cMT number,  
434 the presence of organelles could also change the balance of movements as a function of hypha growth  
435 speed. We thus ran simulations with random flow speeds as described for [Figure 6](#), with no or high  
436 crowding. For the two conditions, the curves representing the frequencies of forward and backward  
437 movements and their ratio, overlapped for all values of the cytoplasmic flow speed ([Figure 7C](#);  
438 [Supplemental Figure S3B](#)). Altogether, these computations show that the larger organelles present in the  
439 hyphae, taking into account their measured sizes and densities, do not affect nuclear dynamics in any  
440 major way. This suggests that the mechanism used for nuclear movements, as modeled here, is robust  
441 with respect to the high, and changing, organelle density required for hyphal growth.

442

## 443 DISCUSSION

444

445 Prior genetic and live-imaging studies had shown that cMT factors and the dynein motor protein  
446 were necessary for the active movements of nuclei in multinucleated hyphae of *A. gossypii*. From these  
447 data, it was possible to hypothesize that the oscillatory movements of nuclei in growing hyphae of *A.*  
448 *gossypii* had evolved from the *S. cerevisiae* Dyn1-Num1 pathway essential for the pulling of the anaphase  
449 spindle into the bud concomitant with its forth and back pulling through the bud neck. This now seems  
450 to be a viable hypothesis. By simulating the process from first principles, we here demonstrated that the  
451 pulling action of cortically anchored dynein motors on cMTs originating from the SPB is sufficient to  
452 explain active nuclear movements observed *in vivo* in a quantitative manner. Importantly, the obtained  
453 agreement between experiments and models was not achieved by adjusting various parameters to fit the  
454 desired behavior. Instead, the key parameters of the model, except one, had been previously determined  
455 experimentally (see [Table 2](#)), including the diameter of the cell, the densities and dimensions of the nuclei  
456 and other objects (Gibeaux *et al.*, 2013), the number of cMTs per nuclei (Gibeaux *et al.*, 2012), the  
457 growth rate at the plus-ends, and MT lengths in the mutants (Grava and Philippsen, 2010). These latest  
458 values allowed us to estimate the catastrophe rate by fitting the length distribution. We could use the  
459 motile and force parameters of yeast dynein, which had been measured in single molecules biophysical  
460 studies. The only unknown biological parameter was the density of cortical anchors in the simulation,  
461 which encapsulates unknown factors such as the concentration of dynein molecules in the cell, and the  
462 effectiveness of the transport, activation and anchoring mechanisms. We therefore explored the effect of  
463 this parameter systematically ([Figure 5](#)). As expected, reducing the quantity of anchors in the cell directly  
464 reduced or disabled nuclear movements, but increasing anchor density quickly led to a plateau where  
465 every cMT contacting the cortex found at least one force generator ([Figure 5C](#)). We selected an  
466 intermediate value, which allowed us to fit all the experimental data (see [Figure 3](#) and summary of the  
467 quantifications in [Table 1](#)). The model reproduced the leading position of the SPB on the nucleus during  
468 the movements (see [Video 4](#)) and recapitulated the rates of forward and backward movements observed  
469 for different values of the cytoplasmic flow, both qualitatively and quantitatively ([Figure 6](#)). Our model  
470 furthermore demonstrated that organelle crowding was only slowing down slightly the movement of the  
471 nuclei, taking into account the measured characteristics ([Figure 7](#)), and this is essential to avoid the  
472 formation of nuclei clusters during hyphal growth. By comparing the observed motion of the nuclei, and  
473 the dependence in the simulation as a function of the density of cortical anchors, we concluded that not  
474 every cMT contacting the cortex would be pulled by dynein ([Figure 5](#)). This indicates that cytoplasmic  
475 flow and dynein-generated forces both contribute significantly to nuclear motions. This is interesting,  
476 because the associated motions are physically of a different nature. Cytoplasmic flow is a convective  
477 motion and the total distance travelled is proportional to time  $x \sim t v_{flow}$ . The dynein-mediated  
478 movements however are stochastically directed towards or away from the hyphae tip, producing without  
479 flow and at long time scales a diffusive motion characterized by the relation  $x \sim \sqrt{t}$ . Because dynein  
480 easily overcomes the hydrodynamic drag of the nuclei, the motion is purely diffusive also in the presence  
481 of flow when cortical anchors are in excess ([Figure 5](#), when the ratio of forward / backward movement  
482 frequencies is  $\sim 1$ ). It seems more advantageous, biologically, to remain away from this regime, to benefit  
483 both from a convective motion that keeps the nuclei equidistant to the growing tip of the hyphae, and  
484 from the dynein-mediated active diffusion, that permutes nuclei. This means that the cell must avoid



485 excessive cortical pulling on its cMTs, by keeping the density of anchors below a certain threshold, or  
486 via some other mechanism.

487 The model made some interesting findings that help us reinterpret recent experimental results.  
488 Firstly, the simulations matched the *in vivo* observations better with 6 cMTs nucleated per nucleus than  
489 with 3 (Table 1). We interpret this to reflect that a high proportion of nuclei carries duplicated side-by-  
490 side SPBs, which is consistent with the fact that, although SPBs nucleate 3 cMTs on average (Gibeaux  
491 *et al.*, 2012), up to 6 cMTs were observed in live imaging of *GFP-AgTub1* “wild type” cells (Lang *et al.*,  
492 2010b). Secondly, our analysis regarding cMT dynamics (Figure 4) demonstrated that the mutant  
493 behavior in *bik1Δ* and *kip3Δ* cells could be explained solely by a change in the cMT properties at the  
494 plus end (polymerization and catastrophe rate). Importantly, this model also highlighted several  
495 adjustments that *A. gossypii* had to undergo to adapt its nuclear movements to hyphal growth from a *S.*  
496 *cerevisiae*-like ancestor. Specifically, cMTs became 4-fold longer, mostly through an increased growth  
497 rate, making them able to reach the cortex (Figure 4). Additionally, the density of anchors at the cortex  
498 had also to increase, such as by 10-fold as suggested by our simulations, to allow enough cMT capture  
499 (Figure 5). Interestingly these adaptations seem enough to provide robustness with respect to the high,  
500 and changing, organelle density required for hyphal growth (Figure 7).

501 By keeping our model minimal, we could thus demonstrate that a small set of ingredients are  
502 enough to explain the basis of the nuclear movements observed in the growing hyphae of *A. gossypii*.  
503 Nevertheless, some open questions remain that were not addressed. For example, we did not include  
504 nuclear division, nor the true elongation of the hyphae, or their branching geometry. The model omitted  
505 the formation of septa, because this only occurs in older regions of the hyphae. These processes will all  
506 be exciting to simulate in the future, but additional work is required to extend the model and exploit it.  
507 Moreover, a mechanism of nuclear repulsion, which leads to the creation of cytoplasmic territories and  
508 enables division autonomy in *A. gossypii*, was recently described (Anderson *et al.*, 2013). These  
509 territories increase in size as a nucleus approaches mitosis and might be mediated by cMTs, but the  
510 mechanism is still unknown. Based on an earlier model (Philippesen *et al.*, 2005), it was suggested that  
511 cMTs from neighboring nuclei could interact and repulse each other. However, live cell imaging and high  
512 resolution analysis of the cMT cytoskeleton by electron tomography did not reveal such interactions  
513 (Lang *et al.*, 2010b; Gibeaux *et al.*, 2012).

514 We found that nuclear movements were different between 3 or 6 cMTs per nucleus but still  
515 remained similar in many aspects, especially in regards to their bypassing frequencies (Table 1). Yet the  
516 reported bypassing frequencies are six times higher for a nucleus in G1 than in G2 (Gibeaux *et al.*, 2012).  
517 According to our model, the duplication state of the SPB is however not expected to account for this  
518 observation. This thus raises a more general and fascinating question: how can a nucleus control its  
519 movements while progressing through the nuclear cycle? Regulating cMT dynamics at the plus-end can  
520 lead to direct changes in nuclear behavior (Figure 4; Supplemental Figure S2), but how could different  
521 SPBs contained in a common cytoplasm provide variable cMT dynamics? The challenge is that both the  
522 site of force production, and the plus end of the cMT that is pulling a nucleus may be distant from this  
523 nucleus. They may be actually located closer to another nucleus, such that any diffusible substance  
524 emitted by a nucleus would not target the productive cMT. Nature has found a solution, however: during  
525 mitosis in *S. cerevisiae*, for example, proteins are able to localize asymmetrically on the two SPBs,  
526 although the cytoplasm is shared. This is the case for Kar9 (Liakopoulos *et al.*, 2003) and Bub2 (Pereira

527 *et al.*, 2000), for instance. Interestingly, the asymmetric localization of Kar9 to one SPB (and MT plus  
528 ends) requires a fine regulation through the cyclin-dependent kinase Cdc28. Bik1 binds directly to Kar9  
529 and promotes its phosphorylation, which affects its asymmetric localization to one SPB and associated  
530 cMTs (Moore *et al.*, 2006; Moore and Miller, 2007). Moreover, it has also been shown that the XMAP215  
531 homologue Stu2, localizes on the SPB and thus regulates the dynamics of the cMTs anchored to it (Usui  
532 *et al.*, 2003). It is therefore possible to imagine that a nucleus, by adjusting the state of the SPBs, could  
533 control plus-end cMT dynamics throughout the nuclear cycle and therefore its movements. However,  
534 whether this is the case in the multinucleated hyphae of *A. gossypii*, has not been investigated yet. It is  
535 actually relevant to note, that dynein is symmetrically distributed to pre-anaphase SPBs of *A. gossypii*  
536 (Grava *et al.*, 2011; Grava and Philippsen, unpublished) whereas asymmetric distribution has been  
537 reported for the pre-anaphase SPBs in *S. cerevisiae* (Grava *et al.*, 2006). Hence, investigating the nature  
538 of mechanisms able to regulate the motile machinery as a function of the nucleus-cycle will be an exciting  
539 task for future research. Finally, our study highlights that, beyond its usefulness to validate a particular  
540 model, modular software such as *Cytosim* can be used to simulate the cytoskeleton in many different  
541 configurations, and thus offers a way to unify our understanding of nuclear migration across the  
542 Eukaryotic kingdoms.

543

## 544 MATERIALS AND METHODS

545

### 546 Extraction of Nuclei 2D coordinates from live imaging data

547 We used 3 recordings of live-hyphae expressing GFP-tagged histone H4 (see [Supplemental Table S1](#) and  
548 [Video 1](#)). The methods used to generate these movies are described in corresponding references. From  
549 12 hyphae recorded over 25-30 min, we extracted the 2D coordinates of the hypha tip and that of the first  
550 5 proximal nuclei (and their progeny). Tracking was done in Fiji (Schindelin *et al.*, 2012) using the  
551 tracking plugin from Fabrice Cordelières (Institut Curie, France). Coordinates were exported as a text  
552 file and further processed with MATLAB (The MathWorks, Inc.). The vector described by the  
553 coordinates of the hypha basis and tip was used to apply a rotational matrix to the data points along the  
554 hypha axis so that all hyphae can be uniformly analyzed with each other and with the simulations. Except  
555 for the analysis presented in [Supplemental Figure S1](#), we smoothed the trajectories using a Savitzky-  
556 Golay filter (smooth function, ‘sgolay’ method, default span and degree) to account for pixel size derived  
557 inaccuracy of tracking resulting in artefactual nuclear displacements. The average growth speed of each  
558 hypha was calculated from the tip positions at the start and end of the movies, and the resulting value  
559 was used as a threshold for the classification of the nuclear movements.

560

### 561 First principles modeling of nuclear dynamics

562 The model of nuclear movements in *Ashbya gossypii* was developed using *Cytosim*, a stochastic engine  
563 that can simulate flexible cytoskeletal fibers, diffusible particles, and other objects in a confined  
564 environment (Nedelec and Foethke, 2007). *Cytosim* is based on Brownian dynamics as well as on a  
565 stochastic description of the most relevant microscopic processes, such as binding/unbinding of  
566 molecules. The motion of a sphere located at position  $\mathbf{x}$  is defined by an over-damped Langevin equation:  
567  $\xi \left( \frac{d\mathbf{x}}{dt} - \mathbf{v}_{flow} \right) = \mathbf{f}(\mathbf{x}, t) + \mathbf{B}(t)$ , where the right-hand terms are the deterministic and random forces  
568 respectively, and  $\xi$  is a drag coefficient calculated with Stokes law from the viscosity and the size of the  
569 sphere. Such equations are suitable because they accurately describe the motion of small objects in a  
570 viscous fluid, characterized by a very low Reynolds number (Nedelec and Foethke, 2007). The equations  
571 for filaments are similar, and were given previously (Nedelec and Foethke, 2007). A soft excluded  
572 volume interaction limits the overlapping of the objects in the simulation. If two spheres of radius  $R$  and  
573  $R'$  are at position  $\mathbf{x}$  and  $\mathbf{x}'$  such that  $|\mathbf{x} - \mathbf{x}'| < R + R'$ , a Hookean force of resting length  $R + R'$  and  
574 stiffness 100 pN/ $\mu\text{m}$  is applied between the two centers. Similarly, the objects are also confined within  
575 the cylinder by forces that are always perpendicular to the cylinder, corresponding to frictionless  
576 boundaries. For simplicity, the hypha cell is simulated as a cylinder with periodic boundaries, a standard  
577 approach to simulate an unbounded system. Its fluid is in uniform motion and drags along all objects  
578 within, but we neglected the variations of flow along the hyphae ([Supplemental Figure S1C](#)), since this  
579 would not be consistent with periodic boundaries. We also neglected the Poiseuille flow profile that is  
580 expected in the transverse section of the hypha and also all kinds of hydrodynamic interactions, by which  
581 the motion of a nucleus could affect nearby nuclei. Cortical anchors are randomly positioned on the  
582 cylinder surface, and remain immobile. An anchor can engage any cMT that comes within its capture  
583 radius (75 nm) at a specified rate ( $5 \text{ s}^{-1}$ ). Engaged anchors immediately recruit a dynein force generator,  
584 which is governed by a linear force-velocity relationship: they move near their maximum speed (25 nm/s)

585 towards the minus-end if the resting force is small, and stall at a force of 7 pN. The duration of the  
586 interaction is determined by the exerted force with detachment rate constant  $w = w_0 \exp\left(\frac{\|\vec{f}\|}{f_0}\right)$ , with  
587  $f_0 = 7$  pN and  $w_0 = 0.64$  s<sup>-1</sup>. At the start of the simulations, 5 nuclei are randomly positioned within the  
588 hypha, and spheres are added randomly to mimic volume occupancy due to large cytoplasmic organelles.  
589 We used 550 beads of 0.4 μm in diameter to fill 8.8% of the cytoplasm and 50 beads of 0.6 μm in diameter  
590 for 2.5%, as occupied by mitochondria and other large spherical organelles, respectively (Gibeaux *et al.*,  
591 2013). The nuclei are spherical, and one point with 3 or 6 cMT *nucleators* on their surface represents the  
592 SPB. Each nucleator can generate one cMT, and will stay attached and inactive to the minus end of this  
593 cMT, which is not dynamic. Cytoplasmic MTs are thus anchored through their minus ends to the SPB,  
594 allowing unrestricted rotational freedom so that they can orient in all directions as previously observed  
595 (Lang *et al.*, 2010b; Gibeaux *et al.*, 2012). Cytoplasmic MTs grow – and stochastically switch to  
596 shrinkage – from their plus ends at a constant speed and with dynamics previously described (Grava and  
597 Philippsen, 2010). When a cMT eventually disappears, it is replaced by a new one with a nucleation time  
598 of 1s, such that the number of cMT per SPB is nearly always maximal. This new cMT is created with a  
599 random orientation. The number of cMT in the simulation is thus either 3 or 6, corresponding to the  
600 average number of cMT measured in cells for isolated or paired SPBs. We have not included the  
601 variability around the mean in the number of cMT, to better observe the difference between the two  
602 conditions. The key physical parameters of the model have been obtained from the literature (see [Table](#)  
603 [2](#)). Numerical parameters are appropriately chosen to ensure sufficient precision (for example, the time  
604 step was 50 ms). The MT assembly dynamics requires ~100s to equilibrate (this time is determined by  
605 the catastrophe time), while steric overlaps are resolved much faster. For extra safety, we skipped 600s  
606 from the initial configuration, and recorded the trajectories of the nuclei for 1800 seconds (30 min) at 2  
607 s intervals. From these records, the 3D coordinates at 30 s intervals (to match the experimental data) and  
608 the flow speed (to be used as a threshold for the movement analysis) were directly processed with  
609 MATLAB for analysis. Cytosim is an Open Source project ([www.github.com/nedelec/cytosim](http://www.github.com/nedelec/cytosim)) and the  
610 configuration file to run the wild-type simulation is provided as supplementary material.

611

### 612 **Automated analysis of nuclei dynamics**

613 Nuclei coordinates along time from both experimental and simulation sources were analyzed similarly  
614 using MATLAB. Minor differences in the analysis were imposed by the fact that experimental data were  
615 effectively 2D, whereas the simulation data were 3D, with periodic boundaries limits. For individual  
616 nucleus, speeds and directions were calculated at each time point. From this and the flow speed (obtained  
617 from hypha growth speed or set parameter in the simulation and used as threshold), the durations of  
618 forward, backward and tumbling events were calculated. The frequency, average duration and average  
619 speed (i.e. average of the instantaneous velocities) of these events were then deducted. The x-position  
620 offset from the center of one nucleus to any other one were calculated and a change in sign was used to  
621 indicate a bypassing event. The frequency of these events was deducted. Statistical tests and plots were  
622 performed in Microsoft Excel or MATLAB (Box plots were generated using Rob Campbell's `notBoxPlot`  
623 function in MATLAB). All MATLAB scripts written for this article can be obtained upon request.

624

625 **ACKNOWLEDGMENTS**

626

627 We thank the members of the Nédélec group for helpful discussions and support, and especially  
628 all the people who have been involved, past and present, in the development of *Cytosim*. We acknowledge  
629 EMBL services for maintaining IT infrastructure, and particularly the computer cluster. We are grateful  
630 to Sandrine Grava for providing raw data of microtubule length measured in *A. gossypii* mutants. We  
631 also thank Rebecca Heald for her support, Christian Häring and Julio Belmonte for critical reading.

632 FN, RG and AZP designed the overall project. RG and PP raised the main biological questions.  
633 FN and AZP further developed the *Cytosim* platform to implement the model. PP provided the supporting  
634 experimental data and his laboratory's expertise. RG ran all the simulations and did the analysis,  
635 supported by FN and AZP. RG, PP and FN wrote the manuscript with inputs from AZP. All authors  
636 discussed the results and commented on the manuscript.

637



638 **REFERENCES**

639

- 640 Adames, N. R., and Cooper, J. a. (2000). Microtubule interactions with the cell cortex causing nuclear  
641 movements in *Saccharomyces cerevisiae*. *J. Cell Biol.* *149*, 863–874.
- 642 Akhmanova, A., and van den Heuvel, S. (2016). Tipping the spindle into the right position. *J. Cell Biol.*  
643 *213*, 293–295.
- 644 Alberti-Segui, C., Dietrich, F., Altmann-Jöhl, R., Hoepfner, D., and Philippsen, P. (2001). Cytoplasmic  
645 dynein is required to oppose the force that moves nuclei towards the hyphal tip in the filamentous  
646 ascomycete *Ashbya gossypii*. *J. Cell Sci.* *114*, 975–986.
- 647 Anderson, C. A., Eser, U., Korndorf, T., Borsuk, M. E., Skotheim, J. M., and Gladfelter, A. S. (2013).  
648 Nuclear repulsion enables division autonomy in a single cytoplasm. *Curr. Biol.* *23*, 1999–2010.
- 649 Bruusgaard, J. C., Liestøl, K., Ekmark, M., Kollstad, K., and Gundersen, K. (2003). Number and  
650 spatial distribution of nuclei in the muscle fibres of normal mice studied in vivo. *J. Physiol.* *551*, 467–  
651 478.
- 652 Cadot, B., Gache, V., Vasyutina, E., Falcone, S., Birchmeier, C., and Gomes, E. R. (2012). Nuclear  
653 movement during myotube formation is microtubule and dynein dependent and is regulated by Cdc42,  
654 Par6 and Par3. *EMBO Rep.* *13*, 741–749.
- 655 Carminati, J. L., and Stearns, T. (1997). Microtubules orient the mitotic spindle in yeast through  
656 dynein-dependent interactions with the cell cortex. *J. Cell Biol.* *138*, 629–641.
- 657 Caudron, F., Andrieux, A., Job, D., and Boscheron, C. (2008). A new role for kinesin-directed transport  
658 of Bik1p (CLIP-170) in *Saccharomyces cerevisiae*. *J. Cell Sci.* *121*, 1506–1513.
- 659 Dietrich, F. *et al.* (2004). The *Ashbya gossypii* genome as a tool for mapping the ancient  
660 *Saccharomyces cerevisiae* genome. *Science* *304*, 304–307.
- 661 Dietrich, F. S., Voegeli, S., Kuo, S., and Philippsen, P. (2013). Genomes of *Ashbya* fungi isolated from  
662 insects reveal four mating-type loci, numerous translocations, lack of transposons, and distinct gene  
663 duplications. *G3 (Bethesda)*. *3*, 1225–1239.
- 664 Dupin, I., and Etienne-Manneville, S. (2011). Nuclear positioning: Mechanisms and functions. *Int. J.*  
665 *Biochem. Cell Biol.* *43*, 1698–1707.
- 666 Fink, G., Schuchardt, I., Colombelli, J., Stelzer, E., and Steinberg, G. (2006). Dynein-mediated pulling  
667 forces drive rapid mitotic spindle elongation in *Ustilago maydis*. *EMBO J.* *25*, 4897–4908.
- 668 Foe, V. E., and Alberts, B. M. (1983). Studies of nuclear and cytoplasmic behaviour during the five  
669 mitotic cycles that precede gastrulation in *Drosophila* embryogenesis. *J. Cell Sci.* *61*, 31–70.
- 670 Fraile, R., and García-Ortega, E. (2005). Fitting an Exponential Distribution. *J. Appl. Meteorol.* *44*,  
671 1620–1625.
- 672 Gibeaux, R., Hoepfner, D., Schlatter, I., Antony, C., and Philippsen, P. (2013). Organization of  
673 organelles within hyphae of *Ashbya gossypii* revealed by electron tomography. *Eukaryot. Cell* *12*,  
674 1423–1432.
- 675 Gibeaux, R., Lang, C., Politi, A. Z., Jaspersen, S. L., Philippsen, P., and Antony, C. (2012). Electron  
676 tomography of the microtubule cytoskeleton in multinucleated hyphae of *Ashbya gossypii*. *J. Cell Sci.*  
677 *125*, 5830–5839.
- 678 Gladfelter, A. S., Hungerbuehler, A. K., and Philippsen, P. (2006). Asynchronous nuclear division  
679 cycles in multinucleated cells. *J. Cell Biol.* *172*, 347–362.

- 680 Grava, S., Keller, M., Voegeli, S., Seger, S., Lang, C., and Philippsen, P. (2011). Clustering of nuclei in  
681 multinucleated hyphae is prevented by dynein-driven bidirectional nuclear movements and microtubule  
682 growth control in *Ashbya gossypii*. *Eukaryot. Cell* *10*, 902–915.
- 683 Grava, S., and Philippsen, P. (2010). Dynamics of multiple nuclei in *Ashbya gossypii* hyphae depend  
684 on the control of cytoplasmic microtubules length by Bik1, Kip2, Kip3, and not on a capture/shrinkage  
685 mechanism. *Mol. Biol. Cell* *21*, 3680–3692.
- 686 Grava, S., Schaerer, F., Faty, M., Philippsen, P., and Barral, Y. (2006). Asymmetric recruitment of  
687 dynein to spindle poles and microtubules promotes proper spindle orientation in yeast. *Dev. Cell* *10*,  
688 425–439.
- 689 Gundersen, G. G., and Worman, H. J. (2013). Nuclear positioning. *Cell* *152*, 1376–1389.
- 690 Huang, B., and Huffaker, T. C. (2006). Dynamic microtubules are essential for efficient chromosome  
691 capture and biorientation in *S. cerevisiae*. *J. Cell Biol.* *175*, 17–23.
- 692 Hwang, E., Kusch, J., Barral, Y., and Huffaker, T. C. (2003). Spindle orientation in *Saccharomyces*  
693 *cerevisiae* depends on the transport of microtubule ends along polarized actin cables. *J. Cell Biol.* *161*,  
694 483–488.
- 695 Jaspersen, S. L., and Winey, M. (2004). The budding yeast spindle pole body: structure, duplication,  
696 and function. *Annu. Rev. Cell Dev. Biol.* *20*, 1–28.
- 697 Kiyomitsu, T. (2015). Mechanisms of daughter cell-size control during cell division. *Trends Cell Biol.*  
698 *25*, 286–295.
- 699 Kosco, K. a, Pearson, C. G., Maddox, P. S., Wang, P. J., Adams, I. R., Salmon, E. D., Bloom, K. S., and  
700 Huffaker, T. C. (2001). Control of microtubule dynamics by Stu2p is essential for spindle orientation  
701 and metaphase chromosome alignment in yeast. *Mol. Biol. Cell* *12*, 2870–2880.
- 702 Kotak, S., and Gönczy, P. (2013). Mechanisms of spindle positioning: cortical force generators in the  
703 limelight. *Curr. Opin. Cell Biol.* *25*, 741–748.
- 704 Kusch, J., Meyer, A., Snyder, M. P., and Barral, Y. (2002). Microtubule capture by the cleavage  
705 apparatus is required for proper spindle positioning in yeast. *Genes Dev.* *16*, 1627–1639.
- 706 Lammers, L. G., and Markus, S. M. (2015). The dynein cortical anchor Num1 activates dynein motility  
707 by relieving Pac1/LIS1-mediated inhibition. *J. Cell Biol.* *211*, 309–322.
- 708 Lang, C., Grava, S., Finlayson, M., Trimble, R., Philippsen, P., and Jaspersen, S. L. (2010a). Structural  
709 mutants of the spindle pole body cause distinct alteration of cytoplasmic microtubules and nuclear  
710 dynamics in multinucleated hyphae. *Mol. Biol. Cell* *21*, 753–766.
- 711 Lang, C., Grava, S., van den Hoorn, T., Trimble, R., Philippsen, P., and Jaspersen, S. L. (2010b).  
712 Mobility, microtubule nucleation and structure of microtubule-organizing centers in multinucleated  
713 hyphae of *Ashbya gossypii*. *Mol. Biol. Cell* *21*, 18–28.
- 714 Lee, C., Zhang, H., Baker, A. E., Occhipinti, P., Borsuk, M. E., and Gladfelter, A. S. (2013). Protein  
715 aggregation behavior regulates cyclin transcript localization and cell-cycle control. *Dev. Cell* *25*, 572–  
716 584.
- 717 Lee, W.-L., Kaiser, M. A., and Cooper, J. A. (2005). The offloading model for dynein function:  
718 differential function of motor subunits. *J. Cell Biol.* *168*, 201–207.
- 719 Lee, W.-L., Oberle, J. R., and Cooper, J. A. (2003). The role of the lissencephaly protein Pac1 during  
720 nuclear migration in budding yeast. *J. Cell Biol.* *160*, 355–364.
- 721 Liakopoulos, D., Kusch, J., Grava, S., Vogel, J., and Barral, Y. (2003). Asymmetric loading of Kar9

- 722 onto spindle poles and microtubules ensures proper spindle alignment. *Cell* *112*, 561–574.
- 723 Markus, S. M., Kalutkiewicz, K. A., and Lee, W. L. (2012). She1-mediated inhibition of dynein  
724 motility along astral microtubules promotes polarized spindle movements. *Curr. Biol.* *22*, 2221–2230.
- 725 Markus, S. M., and Lee, W.-L. L. (2011). Regulated offloading of cytoplasmic dynein from  
726 microtubule plus ends to the cortex. *Dev. Cell* *20*, 639–651.
- 727 Markus, S. M., Plevock, K. M., St Germain, B. J., Punch, J. J., Meaden, C. W., and Lee, W.-L. (2011).  
728 Quantitative analysis of Pac1/LIS1-mediated dynein targeting: Implications for regulation of dynein  
729 activity in budding yeast. *Cytoskeleton (Hoboken)*. *68*, 157–174.
- 730 McNally, F. J. (2013). Mechanisms of spindle positioning. *J. Cell Biol.* *200*, 131–140.
- 731 Miller, R. K., and Rose, M. D. (1998). Kar9p is a novel cortical protein required for cytoplasmic  
732 microtubule orientation in yeast. *J. Cell Biol.* *140*, 377–390.
- 733 Moore, J. K., D’Silva, S., and Miller, R. K. (2006). The CLIP-170 homologue Bik1p promotes the  
734 phosphorylation and asymmetric localization of Kar9p. *Mol. Biol. Cell* *17*, 178–191.
- 735 Moore, J. K., and Miller, R. K. (2007). The cyclin-dependent kinase Cdc28p regulates multiple aspects  
736 of Kar9p function in yeast. *Mol. Biol. Cell* *18*, 1187–1202.
- 737 Moore, J. K., Stuchell-Brereton, M. D., and Cooper, J. A. (2009). Function of dynein in budding yeast:  
738 Mitotic spindle positioning in a polarized cell. *Cell Motil. Cytoskeleton* *66*, 546–555.
- 739 Morris, N. R. (2002). Nuclear positioning: The means is at the ends. *Curr. Opin. Cell Biol.* *15*, 54–59.
- 740 Mouriño-Pérez, R. R., Roberson, R. W., and Bartnicki-García, S. (2006). Microtubule dynamics and  
741 organization during hyphal growth and branching in *Neurospora crassa*. *Fungal Genet. Biol.* *43*, 389–  
742 400.
- 743 Nedelec, F., and Foethke, D. (2007). Collective Langevin dynamics of flexible cytoskeletal fibers. *New*  
744 *J. Phys.* *9*, 427–427.
- 745 Pereira, G., Höfken, T., Grindlay, J., Manson, C., and Schiebel, E. (2000). The Bub2p spindle  
746 checkpoint links nuclear migration with mitotic exit. *Mol. Cell* *6*, 1–10.
- 747 Philippsen, P., Kaufmann, A., and Schmitz, H. P. (2005). Homologues of yeast polarity genes control  
748 the development of multinucleated hyphae in *Ashbya gossypii*. *Curr. Opin. Microbiol.* *8*, 370–377.
- 749 Pruyne, D., and Bretscher, A. (2000). Polarization of cell growth in yeast. *J. Cell Sci.* *113 (Pt 4)*, 571–  
750 585.
- 751 Ramos-García, S. L., Roberson, R. W., Freitag, M., Bartnicki-García, S., Mouriño-Pérez, R. R.,  
752 Freitage, M., Bartnicki-García, S., and Mouriño-Pérez, R. R. (2009). Cytoplasmic bulk flow propels  
753 nuclei in mature hyphae of *Neurospora crassa*. *Eukaryot. Cell* *8*, 1880–1890.
- 754 Roberts, A. J., Goodman, B. S., and Reck-Peterson, S. L. (2014). Reconstitution of dynein transport to  
755 the microtubule plus end by kinesin. *Elife* *2014*, 1–16.
- 756 Roper, M., Simonin, A., Hickey, P. C., Leeder, A., and Glass, N. L. (2013). Nuclear dynamics in a  
757 fungal chimera. *Proc. Natl. Acad. Sci. U. S. A.* *110*, 12875–12880.
- 758 Schindelin, J. *et al.* (2012). Fiji: an open-source platform for biological-image analysis. *Nat. Methods*  
759 *9*, 676–682.
- 760 Shaw, S. L., Yeh, E., Maddox, P. S., Salmon, E. D., and Bloom, K. S. (1997). Astral microtubule  
761 dynamics in yeast: a microtubule-based searching mechanism for spindle orientation and nuclear  
762 migration into the bud. *J. Cell Biol.* *139*, 985–994.

- 763 Sheeman, B., Carvalho, P., Sagot, I., Geiser, J., Kho, D., Hoyt, M. A., and Pellman, D. (2003).  
764 Determinants of *S. cerevisiae* dynein localization and activation: implications for the mechanism of  
765 spindle positioning. *Curr. Biol.* *13*, 364–372.
- 766 Straube, A., and Merdes, A. (2007). EB3 regulates microtubule dynamics at the cell cortex and is  
767 required for myoblast elongation and fusion. *Curr. Biol.* *17*, 1318–1325.
- 768 Tassin, A. M., Maro, B., and Bornens, M. (1985). Fate of microtubule-organizing centers during  
769 myogenesis in vitro. *J. Cell Biol.* *100*, 35–46.
- 770 Telley, I. a., Gaspar, I., Ephrussi, A., and Surrey, T. (2012). Aster migration determines the length scale  
771 of nuclear separation in the *Drosophila* syncytial embryo. *J. Cell Biol.*
- 772 Tirnauer, J. S., O’Toole, E. T., Berrueta, L., Bierer, B. E., and Pellman, D. (1999). Yeast Bim1p  
773 promotes the G1-specific dynamics of microtubules. *J. Cell Biol.* *145*, 993–1007.
- 774 Usui, T., Maekawa, H., Pereira, G., and Schiebel, E. (2003). The XMAP215 homologue Stu2 at yeast  
775 spindle pole bodies regulates microtubule dynamics and anchorage. *EMBO J.* *22*, 4779–4793.
- 776 Walther, A., and Wendland, J. (2004). Apical localization of actin patches and vacuolar dynamics in  
777 *Ashbya gossypii* depend on the WASP homolog Wal1p. *J. Cell Sci.* *117*, 4947–4958.
- 778 Wolyniak, M. J., Blake-Hodek, K., Kosco, K., Hwang, E., You, L., and Huffaker, T. C. (2006). The  
779 regulation of microtubule dynamics in *Saccharomyces cerevisiae* by three interacting plus-end tracking  
780 proteins. *Mol. Biol. Cell* *17*, 2789–2798.
- 781 Woodruff, J. B., Drubin, D. G., and Barnes, G. (2009). Dynein-driven mitotic spindle positioning  
782 restricted to anaphase by She1p inhibition of dynactin recruitment. *Mol. Biol. Cell* *20*, 3003–3011.
- 783 Xiang, X., and Fischer, R. (2004). Nuclear migration and positioning in filamentous fungi. *Fungal*  
784 *Genet. Biol.* *41*, 411–419.
- 785 Yeh, E., Skibbens, R. V, Cheng, J. W., Salmon, E. D., and Bloom, K. S. (1995). Spindle dynamics and  
786 cell cycle regulation of dynein in the budding yeast, *Saccharomyces cerevisiae*. *J. Cell Biol.* *130*, 687–  
787 700.
- 788 Yin, H., Pruyne, D., Huffaker, T. C., and Bretscher, A. (2000). Myosin V orientates the mitotic spindle  
789 in yeast. *Nature* *406*, 1013–1015.
- 790
- 791





819 anaphase spindle is pulled back into the mother cell (Yeh *et al.*, 1995; Adames and Cooper, 2000), most  
820 likely when dynein, captured and activated by Num1 at the mother cortex, exerts higher pulling forces  
821 on the mother cell SPB. This Dyn1-Num1 controlled oscillation of the anaphase pulling can repeat up to  
822 four times before the anaphase spindle is fully elongated.

823

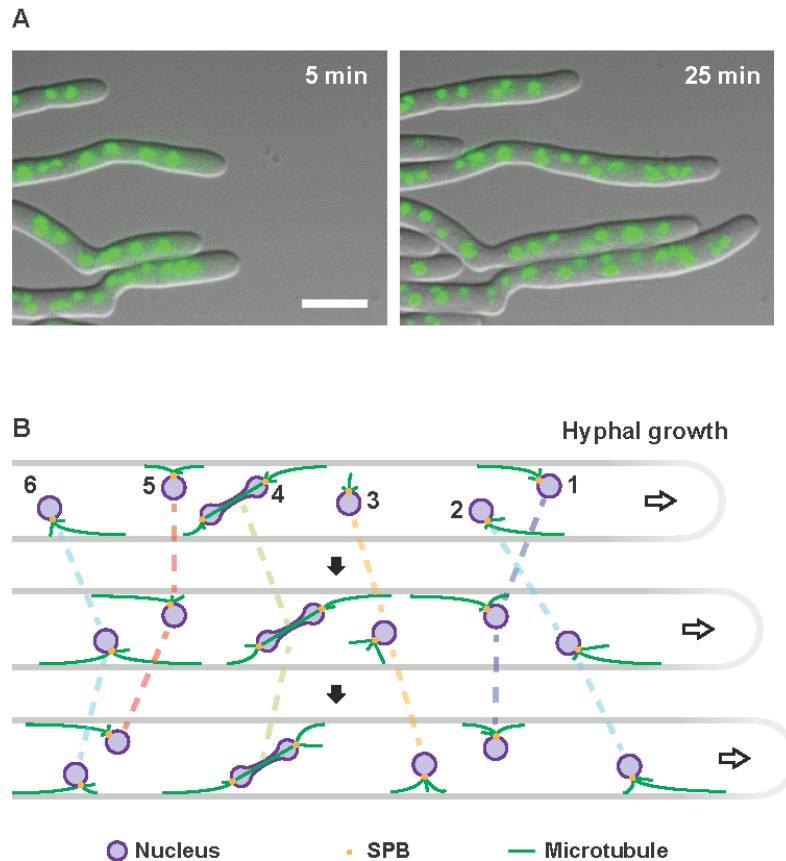

824  
825

826 **FIGURE 2: Nuclear movements in *Ashbya gossypii*.**

827 (A) Visualization of long range nuclear migration and nuclear dynamics in hyphae of *A. gossypii*. Two  
828 merged DIC and fluorescence images of hyphae with histone H4-GFP marked nuclei of Video 1 were  
829 selected to show the efficient polar growth and maintenance of nuclear density. The bar represents 10  
830  $\mu\text{m}$ . (B) Qualitative model of nuclear migration control in a hypha growing from left to right which  
831 causes a cytoplasmic flow (arrow) in the growth direction. The indicated nuclei do not necessarily  
832 represent the most apical six nuclei. Nuclei are autonomous with respect to movements and mitosis  
833 (Alberti-Segui *et al.*, 2001; Gladfelter *et al.*, 2006; Lang *et al.*, 2010b). Each spindle pole body (yellow  
834 dots) nucleates 3 cMTs (green lines) based on electron tomography (Gibeaux *et al.*, 2012). Very long  
835 cMTs can form because the dynamic cMT parameters are adapted to the very long cells (Grava and  
836 Philippsen, 2010; Lang *et al.*, 2010b). Like in *S. cerevisiae*, dynein localizes at the growing end of cMTs  
837 (Grava *et al.*, 2011), and Num1 patches form at the cortex (Schmitz and Landmann, unpublished).  
838 Therefore, dynein can be captured at the cortex by Num1 which initiates pulling on the cMT thereby  
839 moving the nucleus, essentially as described for pulling of the anaphase spindle in *S. cerevisiae* by the  
840 dynein off-loading model (Lee *et al.*, 2003, 2005; Sheeman *et al.*, 2003; Markus and Lee, 2011; Lammers  
841 and Markus, 2015). The cMT continues growing during the pulling (Grava and Philippsen, 2010) until it  
842 eventually will start depolymerizing if its +end undergoes a catastrophe. **Nucleus 1** is pulled backward  
843 and **nucleus 2** forward. The distances pulled are sufficiently long to cause nuclear bypassing. Next,  
844 nucleus 1 stops moving due to balance of backward and forward pulling forces while nucleus 2 continues  
845 to move forward. **Nucleus 3** migrates with the cytoplasmic flow. No cortical contact of cMTs. **Nucleus**

846 **4** first moves forward and then backward as the mitotic nucleus is pulled. Up to a certain length,  
847 elongating spindles can assume any angle with respect to the growth axis (Alberti-Segui *et al.*, 2001;  
848 Grava *et al.*, 2011). **Nucleus 5** is immobile first, then moves backward because the backward-oriented  
849 cMT elongated and is pulled. **Nucleus 6** moves forward and switches to backward movement because  
850 the forward-oriented cMT shrinks and the backward-oriented cMT grows, changing the balance of forces.  
851

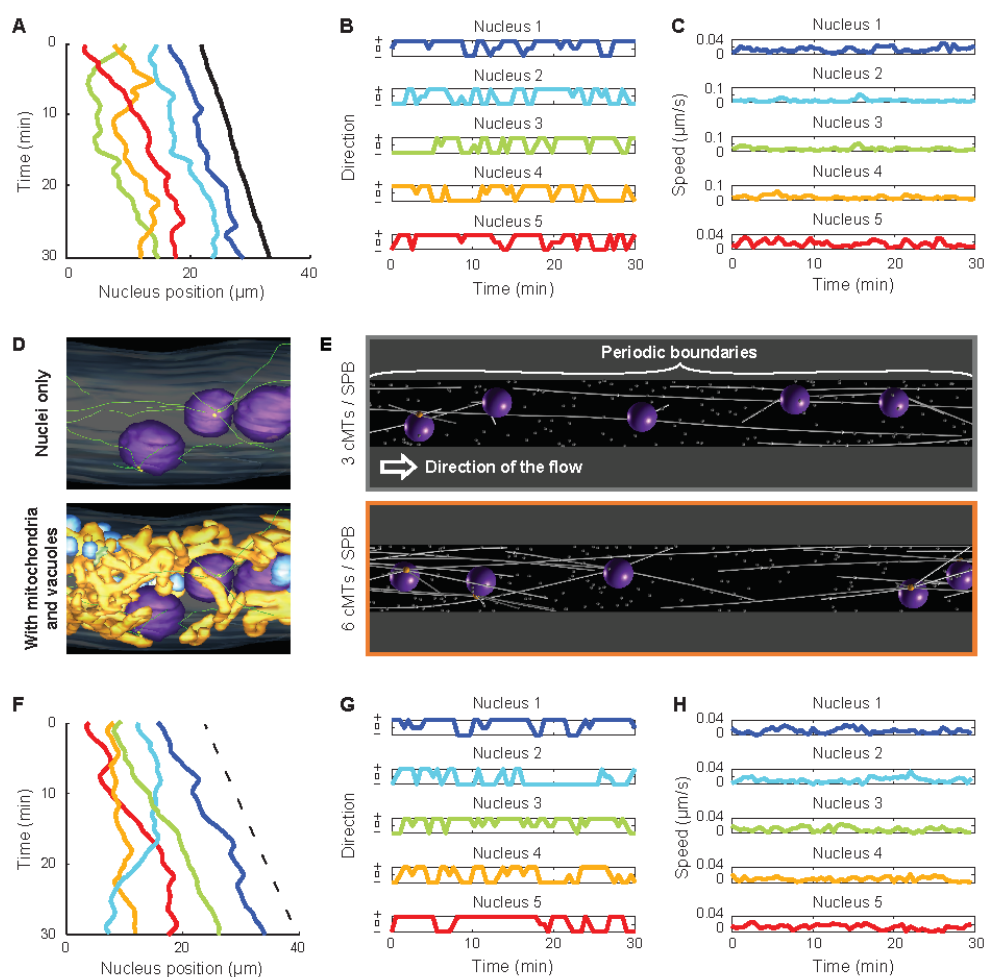

852

853

854

### FIGURE 3: Analyzing in vivo and simulated nuclear movements.

855 (A) The position of five nuclei along time showing movement patterns. The center of individual nuclei

856 (1: Blue, 2: Turquoise, 3: Green, 4: Orange, 5: Red) and the position of the hypha tip (Black) were tracked

857 along the course of the movie. Three reordering (bypassing) events can be seen, whereby two nuclei

858 exchange their ranking along the hyphae. (B) The category of movement of each nucleus as a function

859 of time. From the coordinates of each nucleus (1-5), the signed axial speed of movement  $v_x$  was computed

860 at every time point. The hypha growth speed  $v_h$  was used as a threshold to categorize the movements as

861 follows: forward '+' ( $v_h < v_x$ ), backward '-' ( $v_x < 0$ ) and tumbling '0' ( $0 < v_x < v_h$ ). Colors match panel A.

862 (C) Plots of absolute nuclei speed along time. Magnitude of nuclei speed along time ( $\|v\|$ ) does not

863 distinguish between forward and backward directions. Colors match panel A. (D) Snapshots of electron

864 tomography models. Previously published data (Gibeaux *et al.*, 2012, 2013) were used to generate

865 snapshots showing on the top panel cMTs (green) nucleation and organization from nuclei (purple) -

866 embedded SPBs (yellow) and on the bottom panel, the same nuclei within the cytoplasm crowd,

867 including mitochondria (orange) and vacuoles (blue). (E) Snapshot of simulations. The simulations are

868 performed in 3D within a cylinder with periodic boundaries in  $x$ , as indicated. The simulations contain 5

869 nuclei (dark violet) and each nucleus nucleates 3 (top) or 6 (bottom) cMTs (white lines). Cytoplasmic

870 MTs are attached at their minus ends to one point at the surface of the nucleus (the SPB, orange ball) and

871 grow at their plus ends. Inactive minus end-directed dynein motors are assumed to be present at each  
872 plus end. Each contact of a cMT plus end with a cortical dynein anchor (white dots) will induce pulling.  
873 The arrow indicates the direction of the applied cytoplasmic flow. **(F)** Nuclear positions along time taken  
874 from a simulation with 6 cMTs per nucleus. The  $x$ -coordinates of the center of individual nuclei are  
875 plotted in various colors (1: Blue, 2: Turquoise, 3: Green, 4: Orange, 5: Red), while the dashed line  
876 indicates the applied flow speed. **(G)** The direction of motion of each nucleus along time. The motions  
877 were categorized exactly as in panel B. Colors match panel F. **(H)** Plots of absolute nuclei speed along  
878 time, exactly as in panel C. Colors match panel F.  
879



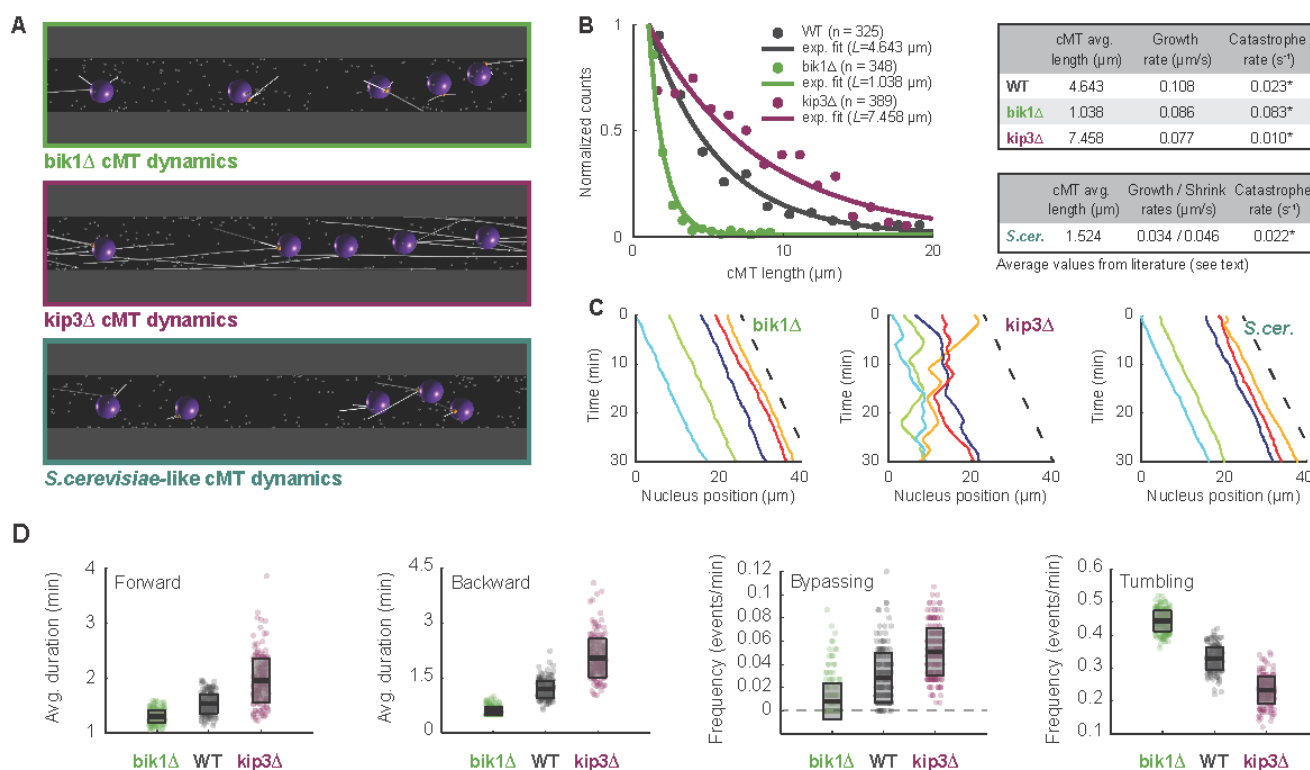

880  
881

882 **FIGURE 4: Verification of nuclear mobility phenotypes in mutants with altered cMT dynamics.**

883 **(A)** Snapshot of simulations with mutant cMT dynamics. The *bik1Δ* (top; green), *kip3Δ* (middle;

884 magenta) and *S. cerevisiae*-like (bottom; dark turquoise) conditions are shown. **(B)** Distributions of cMT

885 length in WT, *bik1Δ* and *kip3Δ* cells. Because, as shown by electron tomography, many cMTs are below

886 the light microscopy resolution, only cMT length values (Grava and Philippsen, 2010) from 1 to 20 μm

887 were used ( $n$  corresponds to the number of data point in this range). The frequency of each bin (circles)

888 and an exponential fit on the truncated distribution (line) is shown (Fraile and García-Ortega, 2005). The

889 corrected average cMT length  $L$  was determined. Data for WT are plotted in gray, for *bik1Δ* in green and

890 for *kip3Δ* in magenta. Tables summarize the determined catastrophe rates for WT, *bik1Δ*, *kip3Δ* and the

891 *S. cerevisiae*-like mutants. The catastrophe rates were calculated (\*) by dividing the published cMT

892 polymerization rates  $v_g$  by  $L$  (see Results and Materials and Methods). **(C)** Plots of nuclear position along

893 time in *bik1Δ* (left), *kip3Δ* (middle) and *S. cerevisiae*-like (right) simulations. The dashed line indicates

894 the applied flow speed. **(D)** Boxplots of nuclear dynamics measurements in “wild-type” and “mutant”

895 simulations. The average duration of forward movements (left), the average duration of backward

896 movements (middle left), the frequency of bypassing events (middle right) and the frequency of tumbling

897 events (right) are plotted. Simulations representing ‘*bik1Δ*’, ‘WT’ and ‘*kip3Δ*’ cells are plotted in green,

898 gray and magenta, respectively. Circles stand for individual simulations; the thick black line marks the

899 average value and the transparent gray box the standard deviation.

900  
901

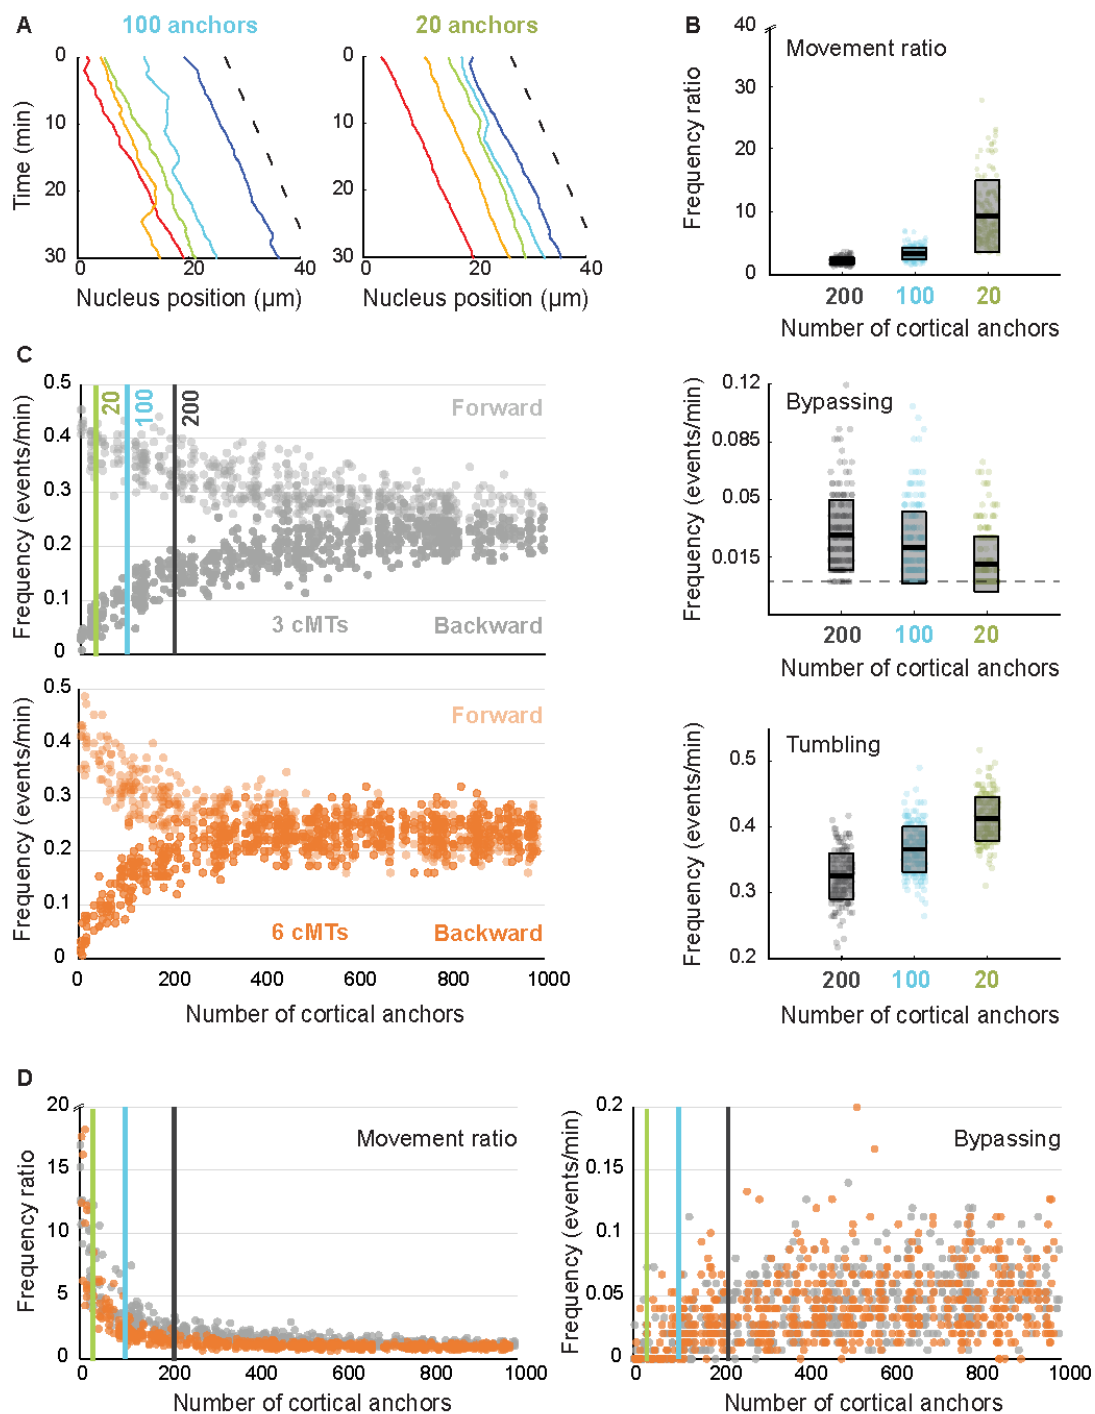

902

903

904

**FIGURE 5: Importance of anchor density at the cell cortex.**

905

(A) The position of five nuclei along time in simulations containing 100 (left) and 20 (right) cortical

906

anchors per 30  $\mu\text{m}$  of hypha. The dashed line indicates the applied flow speed. (B) Quantification of

907

nuclear movements in simulations with 200 (“wild-type”), 100 and 20 cortical anchors. The ratio of

908

forward / backward movement frequencies (top), the frequency of bypassing events (middle) and the

909

frequency of tumbling events (bottom) are shown. The dots stand for individual simulations, and the box

910

indicates the mean and standard deviations. Results obtained with 200, 100 and 20 anchors are plotted

911 in gray, turquoise and lime green, respectively. **(C)** The frequencies of forward (lighter) and backward  
912 (darker) movements as a function of the number of anchors, with 3 cMTs (gray; top) or 6 cMTs (orange;  
913 bottom) per nucleus. Each vertical line at 20, 100 and 200 marks the position of the parameter values  
914 used in B. **(D)** The ratio of forward / backward movement frequencies (left) and the frequencies of  
915 bypassing events (right) as a function of anchor density for 3 cMTs (gray) and 6 cMTs (orange). The  
916 three vertical lines mark the position of the parameter values used in B.  
917  
918

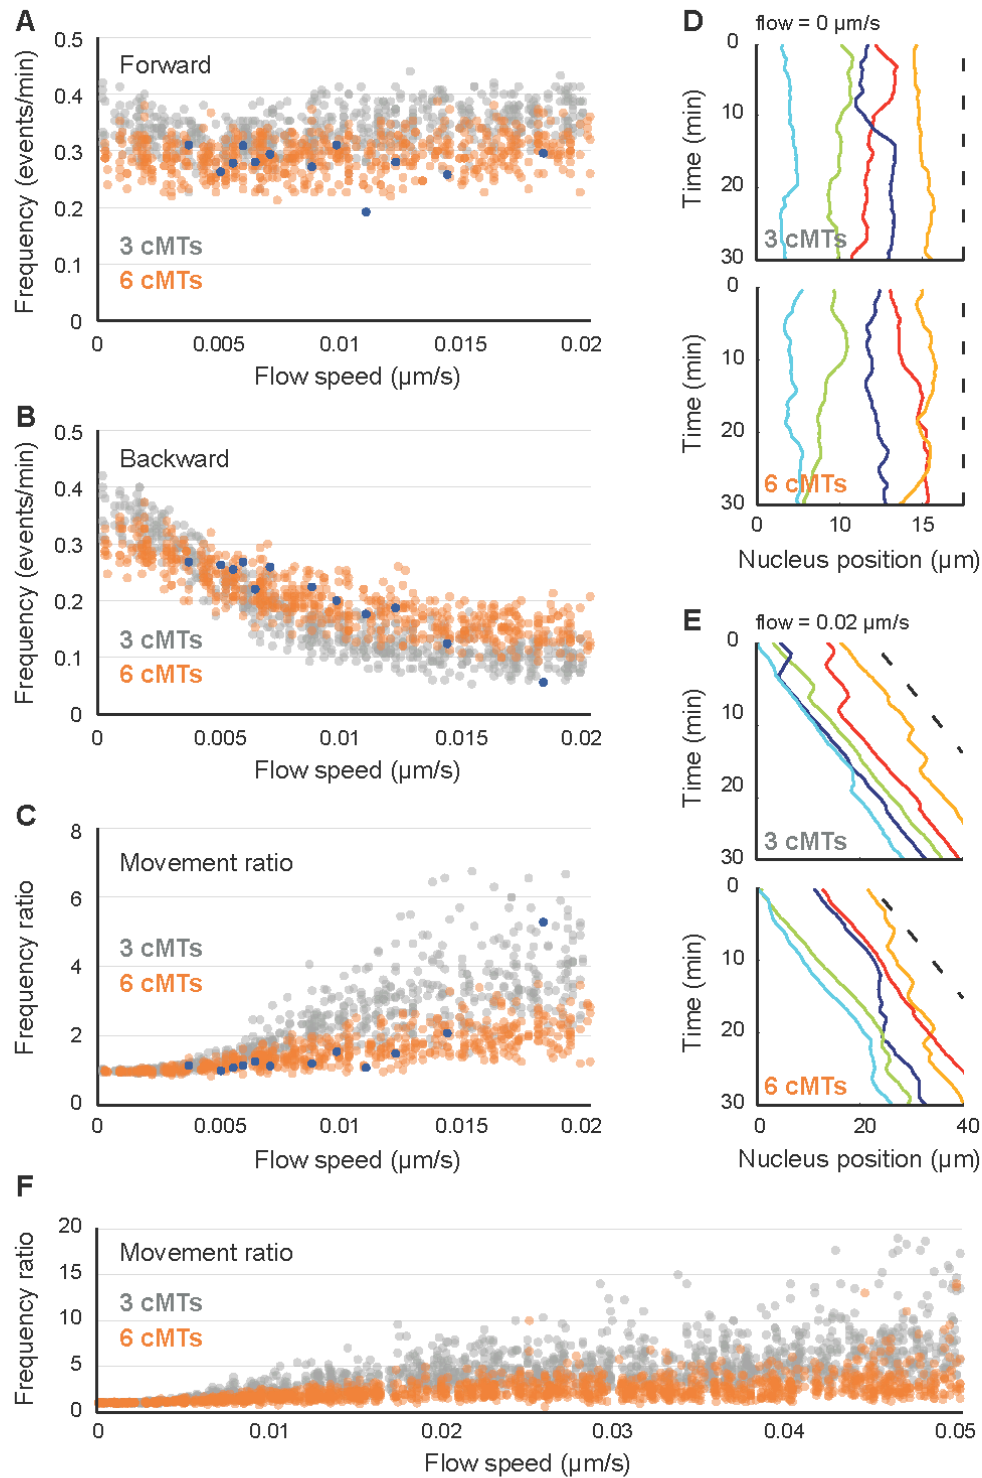

919

920

921 **FIGURE 6: Influence of cytoplasmic flow on nuclear movements and role of cMT number in**  
922 **movement balance.**

923 (A) The frequency of forward movements as a function of increasing cytoplasmic flow (from 0 to 0.02  
924  $\mu\text{m/s}$ ). Simulation values are plotted in gray (3 cMTs per nucleus) and orange (6 cMTs per nucleus) and  
925 experimental values in blue. (B) Plot of the frequency of backward movements as a function of increasing  
926 cytoplasmic flow (from 0 to 0.02  $\mu\text{m/s}$ ). Colors as in panel A. (C) The ratio of movement frequencies

927 (forward/backward) as a function of increasing cytoplasmic flow (from 0 to 0.02  $\mu\text{m/s}$ ). Colors as in  
928 panel A. **(D)** Simulated nuclear positions along time without flow (speed of 0  $\mu\text{m/s}$ ). The  $x$ -coordinates  
929 of the center of individual nuclei (1-5) is plotted in different colors, while the dashed line indicates the  
930 applied flow speed. Top is an example of a simulation with 3 cMTs. Bottom is an example of a simulation  
931 with 6 cMTs. **(E)** Simulated nuclear positions along time with a flow speed of 0.02  $\mu\text{m/s}$ . Same legend  
932 as D. **(F)** The ratio of movement frequencies (forward/backward) as a function of increasing cytoplasmic  
933 flow (from 0 to 0.05  $\mu\text{m/s}$ ). Colors as in panel A.  
934  
935



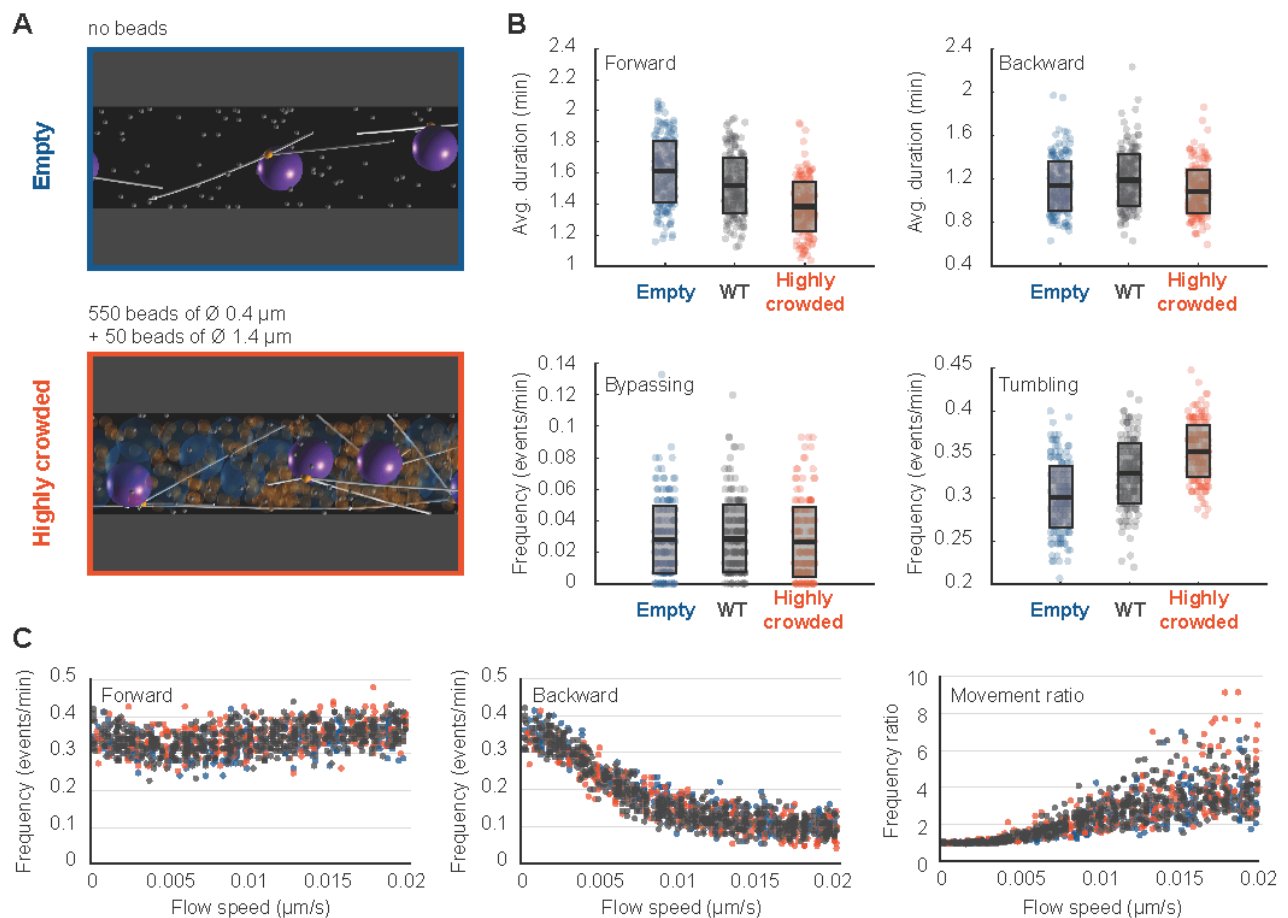

936

937

938

**FIGURE 7: Influence of organelle crowding on nuclear dynamics.**

939 (A) Snapshots of simulations with uncrowded and highly crowded cytoplasm. To represent the “wild-type” (“WT”) situation, the simulation included 550 “mitochondria” spheres of 0.4  $\mu\text{m}$  in diameter and  
940 50 “vacuoles” spheres of diameter 0.6  $\mu\text{m}$ . These objects are removed in the un-crowded ‘empty’ case  
941 (top), while in the highly crowded case (bottom), the 50 “vacuoles” were enlarged to a diameter of 1.4  
942  $\mu\text{m}$ . (B) Boxplots of nuclear dynamics measurements comparing the simulated ‘WT’ situation to ‘empty’  
943 and ‘highly crowded’ simulations. The average duration of forward movements (top left), the average  
944 duration of backward movements (top right), the frequency of bypassing events (bottom left) and the  
945 frequency of tumbling events (bottom right) are plotted. The ‘empty’, ‘WT’ and ‘highly crowded’ data  
946 are plotted in blue, gray and orange, respectively. Circles stand for individual simulations; the thick black  
947 line marks the average value and the transparent gray box the standard deviation. (C) Plots of the  
948 frequencies of forward (left) and backward (middle) movements and their ratio (right) as a function of  
949 increasing cytoplasmic flow (from 0 to 0.02  $\mu\text{m/s}$ ). Colors as in panel B.

950

951

952 **TABLES**

953

**Table 1.** Nuclear dynamics quantification averages from live-imaging experimental data and *in silico* experiments.

|                                                                         | Forward movements                      |                        |                        | Backward movements     |                        | Other movement features |                                     | Tumbling events        | Bypassing events       |
|-------------------------------------------------------------------------|----------------------------------------|------------------------|------------------------|------------------------|------------------------|-------------------------|-------------------------------------|------------------------|------------------------|
|                                                                         | Hypha growth speed ( $\mu\text{m/s}$ ) | Frequency (events/min) | Average duration (min) | Frequency (events/min) | Average duration (min) | Frequency ratio         | Average speed ( $\mu\text{m/min}$ ) | Average duration (min) | Frequency (events/min) |
| <b>All Experiments (12 hyphae; 70 nuclei)</b>                           |                                        |                        |                        |                        |                        |                         |                                     |                        |                        |
| Average                                                                 | 0.009                                  | 0.279                  | 1.703                  | 0.208                  | 1.076                  | 1.628                   | 0.864                               | 0.736                  | 0.026                  |
| SD                                                                      | 0.004                                  | 0.033                  | 0.262                  | 0.065                  | 0.201                  | 1.190                   | 0.209                               | 0.145                  | 0.023                  |
| <b>Simulation with 3 MTs per nucleus (200 simulations, 1000 nuclei)</b> |                                        |                        |                        |                        |                        |                         |                                     |                        |                        |
| Average                                                                 | 0.009                                  | 0.336                  | 1.519                  | 0.147                  | 1.192                  | 2.370                   | 0.724                               | 0.719                  | 0.028                  |
| SD                                                                      |                                        | 0.031                  | 0.176                  | 0.026                  | 0.237                  | 0.512                   | 0.030                               | 0.057                  | 0.021                  |
| <b>Simulation with 6 MTs per nucleus (200 simulations, 1000 nuclei)</b> |                                        |                        |                        |                        |                        |                         |                                     |                        |                        |
| Average                                                                 | 0.009                                  | 0.290                  | 1.544                  | 0.189                  | 1.320                  | 1.576                   | 0.728                               | 0.714                  | 0.033                  |
| SD                                                                      |                                        | 0.031                  | 0.208                  | 0.030                  | 0.217                  | 0.331                   | 0.037                               | 0.061                  | 0.022                  |

954

955

956

957

**Table 2.** Parameters of the simulation.

| Parameter                          | Value                                                                                           | Note                                                                                                                                                                                              | Reference                                                                                          |
|------------------------------------|-------------------------------------------------------------------------------------------------|---------------------------------------------------------------------------------------------------------------------------------------------------------------------------------------------------|----------------------------------------------------------------------------------------------------|
| <b>Global</b>                      |                                                                                                 |                                                                                                                                                                                                   |                                                                                                    |
| Hypha geometry                     | $l = 30 \mu\text{m}$<br>$r = 1.5 \mu\text{m}$                                                   | Cylindrical geometry, periodic along the symmetry axis to allow the simulation of infinitely growing hyphae                                                                                       | See Fig. 1A for an example                                                                         |
| Cytoplasm effective viscosity      | $0.9 \text{ pN s}/\mu\text{m}^2$                                                                | 900 times the viscosity of water                                                                                                                                                                  | (Tol c-N rrelykke et al., 2004; Foethke et al., 2009)                                              |
| Cytoplasmic flow                   | $0.009 \mu\text{m/s}$                                                                           | Impelled by hyphal growth speed<br>Calculated average from experimental data                                                                                                                      | (Lang et al. 2010; Grava and Philippsen 2010; Grava et al. 2011; This study)                       |
| kT                                 | $0.0042 \text{ pN } \mu\text{m}$                                                                | Thermal energy at 25 C                                                                                                                                                                            | (en.wikipedia.org/wiki/Boltzmann_constant)                                                         |
| Large organelles                   | $n = 550 \text{ beads}; r = 200 \text{ nm}$<br>$n = 50 \text{ beads}; r = 300 \text{ nm}$       | For mitochondria (8.8% of cytoplasm) and other organelles (2.5% of cytoplasm)<br>Randomly/uniformly distributed along the cell                                                                    | (Gibeaux et al., 2013)                                                                             |
| Nuclei                             | $n = 5; r = 700 \text{ nm}$                                                                     | Average spacing of $5.75 \mu\text{m}$                                                                                                                                                             | (Lang et al., 2010)                                                                                |
| Time step                          | $0.05 \text{ s}$                                                                                | Computational parameter<br>Total time simulated 30 min                                                                                                                                            | (Nedelec and Foethke, 2007)                                                                        |
| <b>Microtubule</b>                 |                                                                                                 |                                                                                                                                                                                                   |                                                                                                    |
| Nucleators                         | $n = 3 \text{ or } 6$<br>nucleation rate = $1 \text{ s}^{-1}$<br>unbinding rate = 0             | This constitutes the spindle pole body<br>The nucleators nucleate independently, but mechanically behave as a single entity                                                                       | (Gibeaux et al., 2012)                                                                             |
| Plus end growth speed ( $v_{g0}$ ) | $0.108 \mu\text{m/s}$ (WT)<br>$0.086 \mu\text{m/s}$ (bik1 )<br>$0.077 \mu\text{m/s}$ (kip3 )    | Growth speed sets to decrease to 0 with force opposing the direction of growth                                                                                                                    | (Grava and Philippsen, 2010)                                                                       |
| Plus end shrink speed              | $0.272 \mu\text{m/s}$                                                                           |                                                                                                                                                                                                   | (Grava and Philippsen, 2010)                                                                       |
| Catastrophe rate                   | $0.023 \text{ s}^{-1}$ (WT)<br>$0.083 \text{ s}^{-1}$ (bik1 )<br>$0.010 \text{ s}^{-1}$ (kip3 ) | Calculated as the growing speed / average microtubule length, with the average microtubule length determined by fitting the truncated length distribution (see text)                              | (Grava and Philippsen, 2010; This study)                                                           |
| Rescue rate                        | 0                                                                                               | The microtubule depolymerizes completely after a catastrophe                                                                                                                                      |                                                                                                    |
| Growing force                      | $f_g = 1.7 \text{ pN}$                                                                          | Growing velocity is slowed down by antagonistic force ( $f < 0$ ) on plus end as:<br>$v_g = v_{g0} \exp(f / f_g)$                                                                                 | (Dogterom and Yurke, 1997)                                                                         |
| Rigidity                           | $20 \text{ pN } \mu\text{m}^2$                                                                  |                                                                                                                                                                                                   | (Gittes et al., 1993)                                                                              |
| Segmentation                       | $0.5 \mu\text{m}$                                                                               | Computational parameter                                                                                                                                                                           | (Nedelec and Foethke, 2007)                                                                        |
| Steric interaction                 | $r = 25 \text{ nm}$<br>stiffness = $100 \text{ pN}/\mu\text{m}$                                 | Microtubules exclude each other, and cannot penetrate nuclei, mitochondria or vacuoles<br>Nuclei, mitochondria or vacuoles are also subject to steric interaction and repel each other            |                                                                                                    |
| <b>Dynein</b>                      |                                                                                                 |                                                                                                                                                                                                   |                                                                                                    |
| Binding                            | rate = $5 \text{ s}^{-1}$<br>range = $75 \text{ nm}$                                            | Maximal distance to which a binder can bind a filament, and rate at which possible binding can occur                                                                                              |                                                                                                    |
| Unbinding                          | rate $w_0 = 0.64 \text{ s}^{-1}$<br>characteristic force $f_0 = 7 \text{ pN}$                   | Unbinding is increased by force:<br>$w = w_0 \exp(\ f\  / f_0)$                                                                                                                                   |                                                                                                    |
| Motility                           | stall force $f_s = 7 \text{ pN}$<br>unloaded speed $v_w = 0.025 \mu\text{m/s}$                  | The velocity is linearly dependent on force:<br>$v = v_w (1 + \vec{f} \cdot \vec{d} / f_s)$<br>$\vec{d}$ is the direction in which the motor would move along the microtubule if it was unloaded. | (Shingyoji et al., 1998; King and Schroer, 2000; Gennerich et al., 2007; Ori-McKenny et al., 2010) |
| Stiffness                          | $k = 500 \text{ pN}/\mu\text{m}$                                                                | Stiffness of the Hookean spring between the anchoring point on the cell cortex and the position of attachment on the filament<br>$\vec{f} = k \vec{\delta}$                                       |                                                                                                    |

958

959  
960  
961

## SUPPLEMENTAL FIGURES

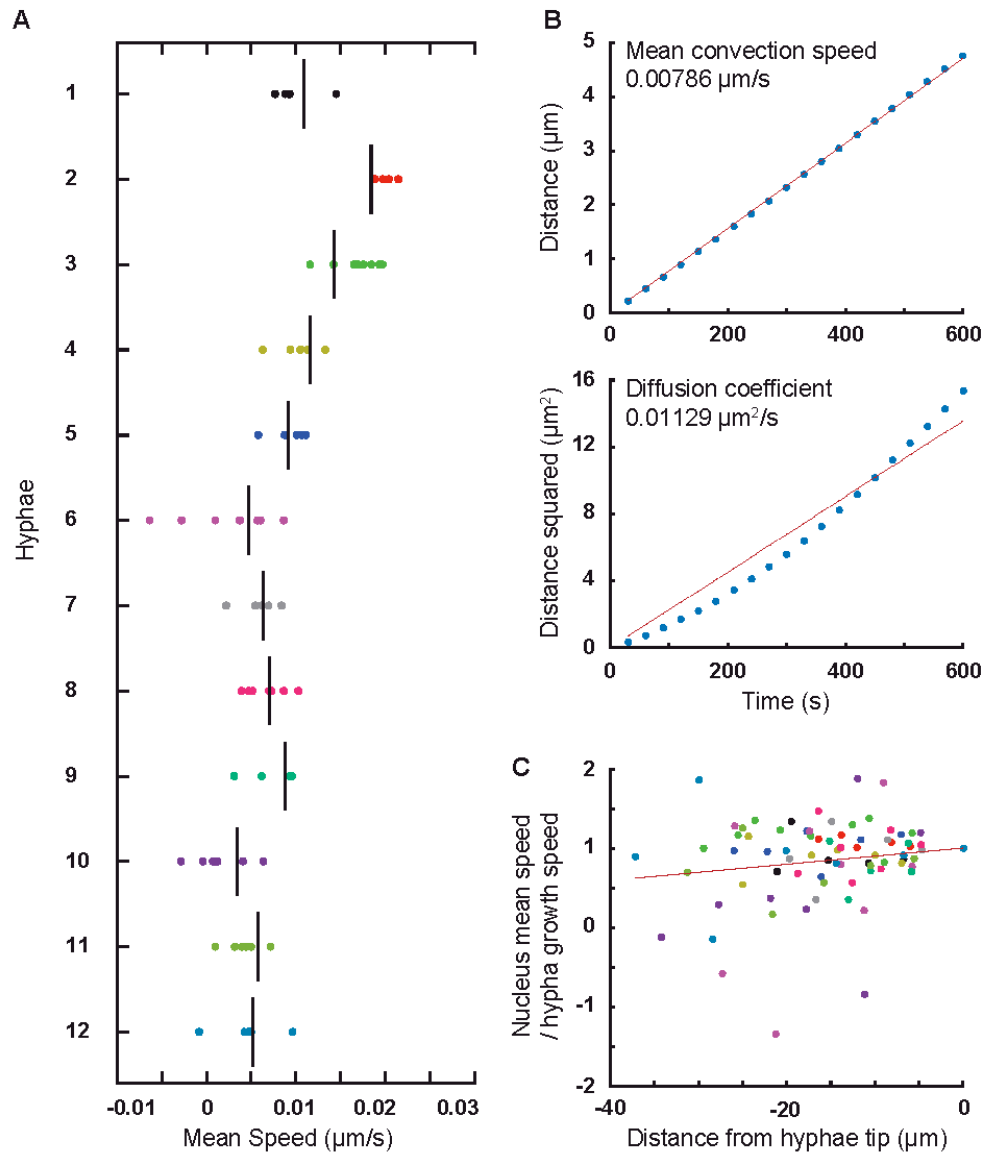

962  
963

### SUPPLEMENTAL FIGURE S1: General characteristics of nuclei movements in hyphae.

964 The main axis of the hyphae was calculated by a principal component analysis using the coordinates ( $x$ ,  
965  $y$ ) of all nuclei and hyphae tip, derived from the tracking. We then used the coordinate  $x$  of the nuclei  
966 along this axis to calculate global characteristics of nuclei motions, pooling the data from 12 hyphae. **(A)**  
967 The average speed of nuclei movement is directed towards the hyphae tip, and is approximately equal to  
968 the speed of hyphae growth. For each hypha, each dot indicates the mean speed of motion of one nucleus,  
969 while the vertical line indicates the speed of tip growth. **(B)** The mean and the variance of  $x(t+\tau) - x(t)$   
970 is plotted as a function of the time interval  $\tau$ , including all time-points  $t$  for which this can be calculated.  
971 Points indicate the experimental data, while the lines indicate linear fits constrained to cross the origin.  
972 The good agreement show that the nuclei move at an average speed of  $\sim 0.008 \mu\text{m/s}$ , with a diffusive  
973 component of  $\sim 0.011 \mu\text{m}^2/\text{s}$ . **(C)** The speed of a nucleus depends on its distance to the hyphae tip  
974

975 (negative here), with more distant nuclei moving slower. The line indicates the best linear fit minimizing  
976 the sum of the squared residuals that crosses (0,1). These results indicate that the cytoplasmic flow is  
977 decreasing away from the hyphae's tip. This effect was however not included in our simulation, since it  
978 would not be consistent with the periodic boundary conditions.

979



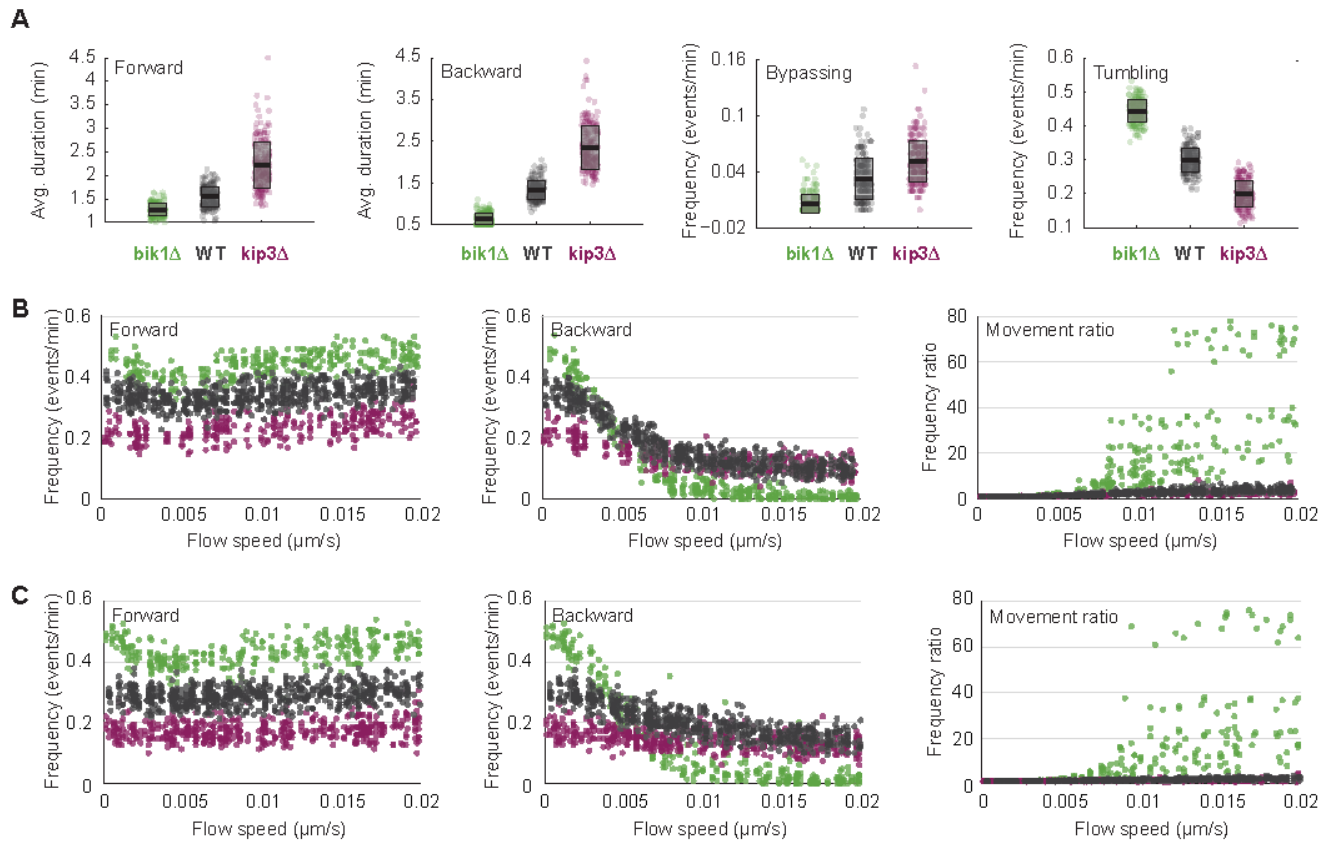

980

981

982

**SUPPLEMENTAL FIGURE S2: Importance of cMT dynamics in modulating nuclear dynamics.**

983

**(A)** Characteristics of nuclear movements in “wild-type” and “mutant” simulations with nuclei

984

nucleating 6 cMTs. The average duration of forward movements (left), the average duration of backward

985

movements (middle left), the frequency of bypassing events (middle right) and the frequency of tumbling

986

events (right) are plotted. Colors as in Figure 4. Circles stand for individual simulations; the thick black

987

line marks the average value and the transparent gray box the standard deviation. **(B)** Plots of the

988

frequencies of forward (left) and backward (middle) movements and their ratio (right) as a function of

989

cytoplasmic flow in “wild-type” and “mutant” simulations with nuclei nucleating 3 cMTs. Colors as in

990

panel A. **(C)** Plots of the frequencies of forward (left) and backward (middle) movements and their ratio

991

(right) as a function of cytoplasmic flow in “wild-type” and “mutant” simulations with nuclei nucleating

992

6 cMTs. Colors as in panel A.

993

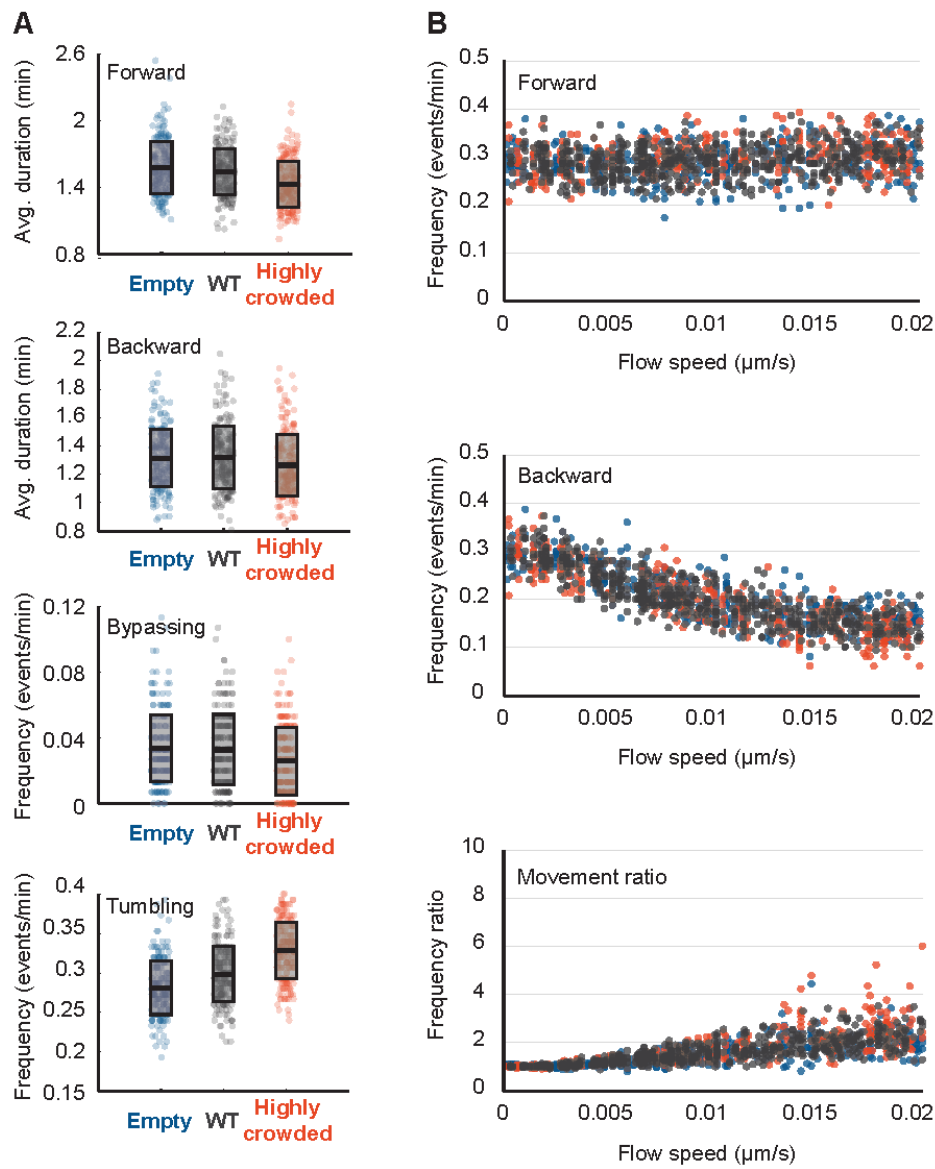

994

995

996

997

**SUPPLEMENTAL FIGURE S3: Consequence of organelle crowding on nuclear dynamics in simulations with nuclei nucleating 6 cMTs.**

998 **(A)** Characteristics of nuclear movements in the simulated ‘WT’, ‘empty’ and ‘highly crowded’  
999 simulations. The average duration of forward movements (top), the average duration of backward  
1000 movements (middle top), the frequency of bypassing events (middle bottom) and the frequency of  
1001 tumbling events (bottom) are plotted. The ‘empty’, ‘WT’ and ‘highly crowded’ data are plotted in blue,  
1002 gray and orange, respectively. Circles stand for individual simulations; the thick black line marks the  
1003 average value and the transparent gray box the standard deviation. **(B)** The frequencies of forward (top)  
1004 and backward (middle) movements and their ratio (bottom) as a function of increasing cytoplasmic flow  
1005 (from 0 to 0.02  $\mu\text{m/s}$ ). Colors as in panel A.

1006 **SUPPLEMENTAL TABLES**

1007

1008

**Supplementary Table S1.** Quantitative description of nuclear dynamics in individual hyphae from live-imaging experimental data.

|                                         | Forward movements         |                                        |                        | Backward movements     |                        | Other movement features |                 | Tumbling events                     |                        | Bypassing events       |                        |
|-----------------------------------------|---------------------------|----------------------------------------|------------------------|------------------------|------------------------|-------------------------|-----------------|-------------------------------------|------------------------|------------------------|------------------------|
|                                         | Weighted number of nuclei | Hypha growth speed ( $\mu\text{m/s}$ ) | Frequency (events/min) | Average duration (min) | Frequency (events/min) | Average duration (min)  | Frequency ratio | Average speed ( $\mu\text{m/min}$ ) | Frequency (events/min) | Average duration (min) | Frequency (events/min) |
| <b>Movie 1</b>                          |                           |                                        |                        |                        |                        |                         |                 |                                     |                        |                        |                        |
| Source:                                 | 5                         | 0.011                                  | 0.192                  | 2.292                  | 0.176                  | 1.159                   | 1.091           | 0.855                               | 0.256                  | 0.969                  | 0.032                  |
| C. Lang, PhD Thesis, 2010 (see Video 1) | 5                         | 0.018                                  | 0.296                  | 1.743                  | 0.056                  | 0.643                   | 5.286           | 1.314                               | 0.352                  | 0.898                  | 0.056                  |
|                                         | 7.76                      | 0.014                                  | 0.258                  | 1.970                  | 0.124                  | 0.875                   | 2.083           | 1.147                               | 0.304                  | 0.907                  | 0.015                  |
|                                         | 6                         | 0.012                                  | 0.280                  | 1.536                  | 0.187                  | 0.893                   | 1.500           | 0.852                               | 0.367                  | 0.791                  | 0.007                  |
|                                         | 5.8                       | 0.010                                  | 0.310                  | 1.444                  | 0.200                  | 0.983                   | 1.552           | 0.784                               | 0.310                  | 0.856                  | 0.007                  |
| <b>Movie 2</b>                          |                           |                                        |                        |                        |                        |                         |                 |                                     |                        |                        |                        |
| Source:                                 | 6.72                      | 0.005                                  | 0.263                  | 1.623                  | 0.263                  | 1.396                   | 1.000           | 0.827                               | 0.144                  | 0.586                  | 0.030                  |
| Gladfelter et al., 2006                 | 5                         | 0.006                                  | 0.280                  | 1.810                  | 0.220                  | 1.121                   | 1.273           | 0.858                               | 0.213                  | 0.609                  | 0.027                  |
|                                         | 6.57                      | 0.007                                  | 0.294                  | 1.716                  | 0.259                  | 1.147                   | 1.137           | 0.904                               | 0.203                  | 0.563                  | 0.061                  |
|                                         | 5                         | 0.009                                  | 0.272                  | 1.735                  | 0.224                  | 1.107                   | 1.214           | 0.947                               | 0.272                  | 0.735                  | 0.064                  |
| <b>Movie 3</b>                          |                           |                                        |                        |                        |                        |                         |                 |                                     |                        |                        |                        |
| Source:                                 | 6.46                      | 0.004                                  | 0.310                  | 1.450                  | 0.268                  | 1.279                   | 1.154           | 0.564                               | 0.191                  | 0.581                  | 0.005                  |
| C. Alberti, PhD Thesis, 2001            | 5.61                      | 0.006                                  | 0.309                  | 1.317                  | 0.268                  | 1.111                   | 1.156           | 0.615                               | 0.250                  | 0.702                  | 0.006                  |
|                                         | 5.89                      | 0.006                                  | 0.278                  | 1.796                  | 0.255                  | 1.200                   | 1.089           | 0.695                               | 0.164                  | 0.638                  | 0.006                  |

1009

1010

1011

1012

1013

**Supplementary Table S2.** Nuclear dynamics quantification averages from microtubule dynamics simulations.

|                                                | Forward movements      |                        | Backward movements     |                        | Other movement features |                                     | Tumbling events        |                        | Bypassing events       |              |
|------------------------------------------------|------------------------|------------------------|------------------------|------------------------|-------------------------|-------------------------------------|------------------------|------------------------|------------------------|--------------|
|                                                | Frequency (events/min) | Average duration (min) | Frequency (events/min) | Average duration (min) | Frequency ratio         | Average speed ( $\mu\text{m/min}$ ) | Frequency (events/min) | Average duration (min) | Frequency (events/min) |              |
| <b>Flow = 0.009 <math>\mu\text{m/s}</math></b> |                        |                        |                        |                        |                         |                                     |                        |                        |                        |              |
| <b>Simulation with 3 MTs per nucleus</b>       |                        |                        |                        |                        |                         |                                     |                        |                        |                        |              |
| bik1 $\Delta$                                  | Average                | <b>0.438</b>           | <b>1.291</b>           | <b>0.047</b>           | <b>0.597</b>            | <b>12.537</b>                       | <b>0.621</b>           | <b>0.443</b>           | <b>0.754</b>           | <b>0.008</b> |
|                                                | SD                     | 0.032                  | 0.113                  | 0.023                  | 0.114                   | 8.439                               | 0.014                  | 0.031                  | 0.055                  | 0.016        |
| kip3 $\Delta$                                  | Average                | <b>0.226</b>           | <b>1.950</b>           | <b>0.121</b>           | <b>2.047</b>            | <b>1.961</b>                        | <b>0.848</b>           | <b>0.232</b>           | <b>0.719</b>           | <b>0.051</b> |
|                                                | SD                     | 0.035                  | 0.408                  | 0.028                  | 0.526                   | 0.537                               | 0.047                  | 0.040                  | 0.066                  | 0.020        |
| <i>S. cerevisiae</i>                           | Average                | <b>0.412</b>           | <b>1.305</b>           | <b>0.055</b>           | <b>0.925</b>            | <b>13.109</b>                       | <b>0.606</b>           | <b>0.435</b>           | <b>0.774</b>           | <b>0.012</b> |
|                                                | SD                     | 0.040                  | 0.130                  | 0.035                  | 0.362                   | 13.302                              | 0.025                  | 0.032                  | 0.063                  | 0.016        |
| <b>Simulation with 6 MTs per nucleus</b>       |                        |                        |                        |                        |                         |                                     |                        |                        |                        |              |
| bik1 $\Delta$                                  | Average                | <b>0.421</b>           | <b>1.268</b>           | <b>0.075</b>           | <b>0.645</b>            | <b>8.618</b>                        | <b>0.602</b>           | <b>0.444</b>           | <b>0.772</b>           | <b>0.006</b> |
|                                                | SD                     | 0.039                  | 0.130                  | 0.046                  | 0.130                   | 7.919                               | 0.030                  | 0.033                  | 0.059                  | 0.010        |
| kip3 $\Delta$                                  | Average                | <b>0.168</b>           | <b>2.211</b>           | <b>0.139</b>           | <b>2.347</b>            | <b>1.263</b>                        | <b>0.830</b>           | <b>0.199</b>           | <b>0.721</b>           | <b>0.051</b> |
|                                                | SD                     | 0.029                  | 0.496                  | 0.029                  | 0.523                   | 0.367                               | 0.056                  | 0.038                  | 0.085                  | 0.022        |
| <i>S. cerevisiae</i>                           | Average                | <b>0.386</b>           | <b>1.258</b>           | <b>0.090</b>           | <b>1.008</b>            | <b>6.782</b>                        | <b>0.571</b>           | <b>0.438</b>           | <b>0.810</b>           | <b>0.014</b> |
|                                                | SD                     | 0.054                  | 0.132                  | 0.054                  | 0.310                   | 5.665                               | 0.041                  | 0.034                  | 0.065                  | 0.016        |
| <b>Flow = 0.013 <math>\mu\text{m/s}</math></b> |                        |                        |                        |                        |                         |                                     |                        |                        |                        |              |
| <b>Simulation with 3 MTs per nucleus</b>       |                        |                        |                        |                        |                         |                                     |                        |                        |                        |              |
| bik1 $\Delta$                                  | Average                | <b>0.456</b>           | <b>1.170</b>           | <b>0.019</b>           | <b>0.635</b>            | <b>33.429</b>                       | <b>0.829</b>           | <b>0.466</b>           | <b>0.826</b>           | <b>0.006</b> |
|                                                | SD                     | 0.029                  | 0.103                  | 0.015                  | 0.187                   | 21.843                              | 0.017                  | 0.029                  | 0.058                  | 0.014        |
| kip3 $\Delta$                                  | Average                | <b>0.235</b>           | <b>1.741</b>           | <b>0.114</b>           | <b>2.203</b>            | <b>2.168</b>                        | <b>0.925</b>           | <b>0.280</b>           | <b>0.794</b>           | <b>0.050</b> |
|                                                | SD                     | 0.034                  | 0.378                  | 0.025                  | 0.569                   | 0.607                               | 0.043                  | 0.039                  | 0.079                  | 0.022        |
| <b>Simulation with 6 MTs per nucleus</b>       |                        |                        |                        |                        |                         |                                     |                        |                        |                        |              |
| bik1 $\Delta$                                  | Average                | <b>0.444</b>           | <b>1.167</b>           | <b>0.031</b>           | <b>0.704</b>            | <b>26.493</b>                       | <b>0.811</b>           | <b>0.465</b>           | <b>0.846</b>           | <b>0.008</b> |
|                                                | SD                     | 0.039                  | 0.101                  | 0.033                  | 0.219                   | 23.849                              | 0.032                  | 0.030                  | 0.060                  | 0.015        |
| kip3 $\Delta$                                  | Average                | <b>0.175</b>           | <b>2.005</b>           | <b>0.130</b>           | <b>2.275</b>            | <b>1.409</b>                        | <b>0.878</b>           | <b>0.252</b>           | <b>0.849</b>           | <b>0.057</b> |
|                                                | SD                     | 0.029                  | 0.393                  | 0.027                  | 0.601                   | 0.397                               | 0.050                  | 0.035                  | 0.093                  | 0.023        |

1014

1015

1016

1017

1018

1019

1020

1021

1022

1023  
1024

**Supplementary Table S3.** Nuclear dynamics quantification averages with cortical anchors amount decreased to 100 or 20 anchors per hypha

|                                                       |         | Forward movements      |                        | Backward movements     |                        | Other movement features |                                            | Tumbling events        |                        | Bypassing events       |
|-------------------------------------------------------|---------|------------------------|------------------------|------------------------|------------------------|-------------------------|--------------------------------------------|------------------------|------------------------|------------------------|
|                                                       |         | Frequency (events/min) | Average duration (min) | Frequency (events/min) | Average duration (min) | Frequency ratio         | Average speed ( $\mu\text{m}/\text{min}$ ) | Frequency (events/min) | Average duration (min) | Frequency (events/min) |
| <b>Flow = 0.009 <math>\mu\text{m}/\text{s}</math></b> |         |                        |                        |                        |                        |                         |                                            |                        |                        |                        |
| <b>Simulation with 3 MTs per nucleus</b>              |         |                        |                        |                        |                        |                         |                                            |                        |                        |                        |
| 100 anchors                                           | Average | 0.367                  | 1.444                  | 0.110                  | 1.040                  | 3.537                   | 0.674                                      | 0.369                  | 0.749                  | 0.021                  |
|                                                       | SD      | 0.033                  | 0.160                  | 0.026                  | 0.223                  | 0.974                   | 0.025                                      | 0.035                  | 0.058                  | 0.022                  |
| 20 anchors                                            | Average | 0.408                  | 1.382                  | 0.053                  | 0.816                  | 9.478                   | 0.630                                      | 0.415                  | 0.769                  | 0.011                  |
|                                                       | SD      | 0.032                  | 0.143                  | 0.021                  | 0.282                  | 5.708                   | 0.014                                      | 0.033                  | 0.059                  | 0.017                  |
| <b>Simulation with 6 MTs per nucleus</b>              |         |                        |                        |                        |                        |                         |                                            |                        |                        |                        |
| 100 anchors                                           | Average | 0.329                  | 1.516                  | 0.144                  | 1.170                  | 2.407                   | 0.682                                      | 0.339                  | 0.732                  | 0.022                  |
|                                                       | SD      | 0.034                  | 0.200                  | 0.031                  | 0.197                  | 0.662                   | 0.029                                      | 0.037                  | 0.057                  | 0.019                  |
| 20 anchors                                            | Average | 0.393                  | 1.407                  | 0.057                  | 0.986                  | 8.475                   | 0.623                                      | 0.406                  | 0.783                  | 0.006                  |
|                                                       | SD      | 0.033                  | 0.156                  | 0.021                  | 0.319                  | 5.592                   | 0.016                                      | 0.032                  | 0.054                  | 0.014                  |

1025  
1026  
1027  
1028  
1029

**Supplementary Table S4.** Nuclear dynamics quantification averages with or without cytoplasmic organelle crowding.

|                                                       |         | Forward movements      |                        | Backward movements     |                        | Other movement features |                                            | Tumbling events        |                        | Bypassing events       |
|-------------------------------------------------------|---------|------------------------|------------------------|------------------------|------------------------|-------------------------|--------------------------------------------|------------------------|------------------------|------------------------|
|                                                       |         | Frequency (events/min) | Average duration (min) | Frequency (events/min) | Average duration (min) | Frequency ratio         | Average speed ( $\mu\text{m}/\text{min}$ ) | Frequency (events/min) | Average duration (min) | Frequency (events/min) |
| <b>Flow = 0.009 <math>\mu\text{m}/\text{s}</math></b> |         |                        |                        |                        |                        |                         |                                            |                        |                        |                        |
| <b>Simulation with 3 MTs per nucleus</b>              |         |                        |                        |                        |                        |                         |                                            |                        |                        |                        |
| No organelles                                         | Average | 0.323                  | 1.610                  | 0.160                  | 1.138                  | 2.084                   | 0.774                                      | 0.301                  | 0.692                  | 0.028                  |
|                                                       | SD      | 0.033                  | 0.196                  | 0.030                  | 0.225                  | 0.426                   | 0.033                                      | 0.036                  | 0.056                  | 0.021                  |
| Large organelles                                      | Average | 0.348                  | 1.383                  | 0.151                  | 1.088                  | 2.431                   | 0.673                                      | 0.354                  | 0.788                  | 0.026                  |
|                                                       | SD      | 0.030                  | 0.158                  | 0.031                  | 0.202                  | 0.631                   | 0.029                                      | 0.030                  | 0.061                  | 0.022                  |
| <b>Simulation with 6 MTs per nucleus</b>              |         |                        |                        |                        |                        |                         |                                            |                        |                        |                        |
| No organelles                                         | Average | 0.284                  | 1.582                  | 0.198                  | 1.313                  | 1.484                   | 0.768                                      | 0.281                  | 0.696                  | 0.034                  |
|                                                       | SD      | 0.033                  | 0.196                  | 0.030                  | 0.225                  | 0.426                   | 0.033                                      | 0.036                  | 0.056                  | 0.021                  |
| Large organelles                                      | Average | 0.296                  | 1.432                  | 0.191                  | 1.264                  | 1.587                   | 0.670                                      | 0.328                  | 0.770                  | 0.026                  |
|                                                       | SD      | 0.032                  | 0.208                  | 0.031                  | 0.215                  | 0.320                   | 0.033                                      | 0.036                  | 0.069                  | 0.021                  |

1030  
1031

1032 **VIDEOS**

1033

1034 **VIDEO 1:** Example of live-hyphae expressing GFP-tagged histone H4. DIC in gray and GFP signal in  
1035 green.

1036

1037 **VIDEO 2 to 15:**

1038 These 14 movies represent various conditions, but the graphical representation is always identical, unless  
1039 otherwise stated. The hypha (black) contains 5 nuclei (purple). One SPB (orange) on each nucleus may  
1040 nucleate either 3 or 6 cMTs (white lines) that are elongating or shortening at the (distal) plus-end. MTs  
1041 may be pulled by dynein motors that load on fixed anchored at the cortex. The anchor points are displayed  
1042 gray, and then green if a dynein is engaged. Forces produced by dynein motors and transmitted along the  
1043 MTs can move the nucleus. The simulation uses periodic boundary conditions, and objects leaving on  
1044 the right side reappear and the left side, and vice-versa. The cytoplasm is also filled with various  
1045 organelles. Unless otherwise noted, the simulation contains 550 spheres of diameter  $0.4\mu\text{m}$   
1046 (mitochondria, orange) and 50 spheres of diameter  $0.6\mu\text{m}$  (blue, large spherical organelles) and a uniform  
1047 cytoplasmic flow is moving all objects from left to right at a speed of  $0.009\ \mu\text{m/s}$ .

1048

1049 **VIDEO 2:** A “wild-type” simulation with 3 cMTs per nucleus.

1050

1051 **VIDEO 3.** A “wild-type” simulation with 6 cMTs per nucleus.

1052

1053 **VIDEO 4.** A “wild-type” simulation with 3 cMTs per nucleus. The same simulation as shown on Video  
1054 1 is displayed here, using a different style. The organelles are not displayed, and the nuclei are semi-  
1055 transparent such that the SPB (orange) is always visible. The cortical anchors are drawn in dark gray  
1056 when they are unbound/inactive, and green when they are loaded with bound/active dynein. The re-  
1057 orientation of the SPB upon pulling is clearly visible, for example for the right-most nucleus during the  
1058 interval 1400–1700s.

1059

1060 **VIDEO 5.** A simulation with *bik1 $\Delta$* -like MT dynamics. Everything is like the “wild-type” with 3  
1061 cMT/nucleus, except that MT growth and catastrophe rates were altered to represent the MT dynamics  
1062 in *bik1 $\Delta$*  mutants (see [Figure 4A-B](#)).

1063

1064 **VIDEO 6.** A simulation with *kip3 $\Delta$* -like MT dynamics. Everything is like the “wild-type” with 3  
1065 cMT/nucleus, except that MT growth and catastrophe rates were altered to represent the MT dynamics  
1066 in *kip3 $\Delta$*  mutants (see [Figure 4A-B](#)).

1067

1068 **VIDEO 7.** A simulation with *S. cerevisiae*-like MT dynamics. Everything is like the “wild-type” with 3  
1069 cMT/nucleus, except that MT growth and shrinkage as well as catastrophe rates were altered to represent  
1070 the MT dynamics measured in *S. cerevisiae* (see [Figure 4A-B](#)).

1071

1072 **VIDEO 8.** A simulation with a reduced number of cortical anchors. Everything is like the “wild-type”  
1073 with 3 cMT/nucleus, except that the number of anchors on the cortex has been reduced to 100 instead of



1074 200.

1075

1076 **VIDEO 9.** A simulation with an even more reduced number of cortical anchors. Everything is like the  
1077 “wild-type” with 3 cMT/nucleus, except that the number of cortical anchors has been reduced to 20  
1078 instead of 200.

1079

1080 **VIDEO 10.** A “wild-type” simulation with 3 cMTs per nucleus and no cytoplasmic flow (speed = 0  
1081  $\mu\text{m/s}$ .)

1082

1083 **VIDEO 11.** A “wild-type” simulation with 6 cMTs per nucleus and no cytoplasmic flow (speed = 0  
1084  $\mu\text{m/s}$ ).

1085

1086 **VIDEO 12.** A “wild-type” simulation with 3 cMTs per nucleus at a high cytoplasmic flow (speed = 0.02  
1087  $\mu\text{m/s}$ ).

1088

1089 **VIDEO 13.** A “wild-type” simulation with 6 cMTs per nucleus at a high cytoplasmic flow (speed = 0.02  
1090  $\mu\text{m/s}$ ).

1091

1092 **VIDEO 14.** An “empty” simulation without organelles. The simulation does not contain the extra spheres  
1093 that are used to represent mitochondria and large spherical organelles.

1094

1095 **VIDEO 15.** A simulation with “high” crowding. The simulation contains 550 spheres of 0.4  $\mu\text{m}$  in  
1096 diameter (orange, simulating mitochondria) and 50 beads of 1.4  $\mu\text{m}$  in diameter (blue, simulating large  
1097 spherical organelles in old hyphae).

```
% This is a configuration file for cytosim (www.cytosim.org)
% Please, used it with the Open Source code available on:
% http://www.github.com/nedelec/cytosim
%
% Simulation of nuclear dynamics in multinucleated hyphae of Ashbya
gossypii
% R. Gibeaux, A. Politi, F. Nedelec - 06/2012-08/2014

set simul Ashbya
{
    time_step = 0.05
    % 'viscosity=0.9' from Tolic-Norrelykke et al. 2004.
    viscosity = 0.9
    steric = 1, 100
    precondition = 0
    display = ( back_color=dark_gray; inner_color=black; style=3;
size=1280,256; )
    steric_max_range = 1.5
    flow = 0 0 0
}

%%% The hypha %%%%%%%%%%%%%%%

set space cell
{
    geometry = (cylinderP 15 1.5)
    display = { color=black; }
}

new space cell

%%% Microtubules %%%%%%%%%%%%%%%

% Values for MT dynamics in Ashbya gossypii from Grava and Philippsen
MBoC 2010 21, 3680-3692
% Assumption that catastrophe rate = growing speed / average MT length
% MT length obtained from raw data of Grava and Philippsen MBoC 2010 21,
3680-3692
% Fit on truncated exponential distribution, Fraile and Garcia-Ortega JoAM
2005 44, 1620-25
% Only MT between 1 to 20 um considered for fit as high number of very
short MT observed by ET in Gibeaux et al. JCS 2012

set fiber microtubule
{
    rigidity = 20
    segmentation = 0.5
    growing_force = 1.7
    steric = 1, 0.025
    confine = inside, 100
    activity = classic
    growing_speed = 0.108, 0
    shrinking_speed = -0.272
```

```
    catastrophe_rate = 0.023
    min_length = 0
    display = ( plus_end=8,2; color=white; line=2.5; )
}

%%% Dynein %%%%%%%%%%%%%%%

set hand dynein
{
    binding_rate = 5
    unbinding_rate = 0.64 % 0.64 in King and Schroer, NCB 2000, 2
    binding_range = 0.075
    unbinding_force = 7
    activity = motor
    % Unloaded speed ~ 0.05 um/s from Gennerich et al. Cell 2007, 131,
952-965
    max_speed = -0.025
    limit_speed = 1
    hold_shrinking_end = 0
    bind_also_end = 1
    % 'stall_force=6 pN' from Shingyoji et al. Nature 1998, 393
    % 'stall_force=7 pN' from Gennerich et al. Cell 2007, 131, 952-965
    stall_force = 7
    display = ( color=green; size=7; )
}

set single dyneinNum1
{
    hand = dynein
    stiffness = 500
    activity = fixed
}

%%% Nucleus %%%%%%%%%%%%%%%

set sphere nucleus
{
    confine = all_inside, 100
    point_mobility = 0.1
    steric = 1
    display = ( color=0x7700CCFF; style=14; )
}

set hand nucleator
{
    binding_rate = 10
    binding_range = 0.05
    unbinding_rate = 0
    unbinding_force = 3
    activity = nucleate
    nucleate = 1, microtubule, ( fiber_length=0.5 )
    display = ( size=12; color=orange; )
    specificity = none
}
```

```
set single handle
{
    hand = nucleator
    stiffness = 500
}

%%% Congestion %%%%%%%%%%%%%%%

% Congestion data from Gibeaux et al. 2013

set bead mito
{
    confine = all_inside, 100
    steric = 1
    display = ( color=0xFF993333 ; style=6; )
}

set bead vacuole
{
    confine = all_inside, 100
    steric = 1
    display = ( color=0x3399FF33 ; style=6; )
}

%-----
%----- Simulation -----
%-----

% Spacing between nuclei of 3-6 um, Fig1. Lang et al. MBoC 2010, 21, 753-766

new 5 sphere nucleus
{
    radius = 0.7
    point0 = surface, 3 handle
}

new 200 single dyneinNum1
{
    position = surface
}

% to be around 8.8% of the full volume
new 550 bead mito
{
    radius = 0.2
}

% to be around 2.5% of the full volume
new 50 bead vacuole
{
    radius = 0.3
}
```

```
%%% Equilibrate & RUN %%%%%%%%%%%
```

```
run simul *
```

```
{
```

```
    nb_steps = 6000
```

```
    nb_frames = 0
```

```
}
```

```
% Speed of flow 0.15 - 1.28 um/min from Table 1 Lang et al. 2010 MBoC,  
21, 18-28
```

```
% Speed used for mutant comparison around 0.75 um/min in Grava and  
Philippsen 2010 MBoC 21, 3680-3692; Grava et al. 2011 EC, 10, 7, 902-915.
```

```
% The flow should be slightly higher to compensate for brownian and set  
in um/s.
```

```
change simul * { flow = 0.009 0 0 }
```

```
run simul *
```

```
{
```

```
    nb_steps = 6000
```

```
    nb_frames = 0
```

```
}
```

```
run simul *
```

```
{
```

```
    nb_steps = 36000
```

```
    nb_frames = 900
```

```
}
```
